# Supplementary material
Source: publisher figshare collection journal article supplement (https://acs.figshare.com/ndownloader/files/26492042)
Supplement: Supplementary file 1 [file 26492042]

## Sheet: DSSO_PSMs
Fraction	Annotated Sequence	Modifications	Protein Accessions	Charge	DeltaScore	DeltaCn	m/z [Da]	MH+ [Da]	Theo. MH+ [Da]	DeltaM [ppm]	Deltam/z [Da]	Isolation Interference [%]	First Scan	XCorr
Input	LGEHNIDVLEGNEQFINAAK		spTRYP_PIG|	3	1	0	737.706	2211.1	2211.1	0.39	0.00029	9.46863	35984	7.25
Input	LFTFHADIcTLPDTEK	C9(Carbamidomethyl)	spALBU_BOVIN|	3	0.9199	0	636.645	1907.92	1907.92	-0.24	-0.00015	15.5636	37932	6.37
Input	RHPYFYAPELLYYANK		spALBU_BOVIN|	3	0.9918	0	682.349	2045.03	2045.03	1.48	0.00101	6.68538	39356	6.09
Input	GLVLIAFSQYLQQcPFDEHVK	C14(Carbamidomethyl)	spALBU_BOVIN|	3	1	0	831.427	2492.27	2492.26	1.03	0.00086	9.60751	52634	5.73
Input	EccHGDLLEcADDRADLAK	C2(Carbamidomethyl); C3(Carbamidomethyl); C10(Carbamidomethyl)	spALBU_BOVIN|	3	1	0	749.984	2247.94	2247.94	-1.85	-0.00139	55.9089	27181	5.7
Input	IITHPNFNGNTLDNDImLIK	M17(Oxidation)	spTRYP_PIG|	3	1	0	767.064	2299.18	2299.18	0.42	0.00032	13.089	39125	5.61
Input	kNLIGALLFDSGETAEATR	K1(DSSO:H2O)	Cas9	3	1	0	728.031	2182.08	2182.07	3.72	0.0027	0.0731441	51556	5.57
Input	HPYFYAPELLYYANK		spALBU_BOVIN|	3	1	0	630.316	1888.93	1888.93	3.95	0.00248	1.37112	42897	5.37
Input	KNLIGALLFDSGETAEATR		Cas9	3	0.7472	0	669.357	2006.06	2006.06	0.75	0.0005	56.2012	44493	5.34
Input	KIEcFDSVEISGVEDR	C4(Carbamidomethyl)	Cas9	3	0.8953	0	628.301	1882.89	1882.89	1.03	0.00065	19.6303	31658	5.16
Input	RHPEYAVSVLLR		spALBU_BOVIN|	3	1	0	480.609	1439.81	1439.81	-0.08	-4e-05	0	30380	5.13
Input	kNLIGALLFDSGETAEATR	K1(DSSO:H2O)	Cas9	3	0.8765	0	728.029	2182.07	2182.07	0.78	0.00057	0.941841	51920	5.1
Input	RHPYFYAPELLYYANK		spALBU_BOVIN|	3	0.9744	0	682.349	2045.03	2045.03	1.92	0.00131	13.9283	39814	5.07
Input	MTNFDKNLPNEK		Cas9	3	0.8765	0	484.238	1450.7	1450.7	0.3	0.00014	8.09674	23656	5.02
Input	RHPYFYAPELLYYANK		spALBU_BOVIN|	3	0.9279	0	682.348	2045.03	2045.03	0.04	3e-05	16.1369	40289	4.99
Input	RHPEYAVSVLLR		spALBU_BOVIN|	3	1	0	480.609	1439.81	1439.81	0.18	9e-05	10.1822	30812	4.97
Input	EccHGDLLEcADDRADLAK	C2(Carbamidomethyl); C3(Carbamidomethyl); C10(Carbamidomethyl)	spALBU_BOVIN|	4	0.8548	0	562.741	2247.94	2247.94	-0.09	-5e-05	22.8096	27186	4.89
Input	RHPEYAVSVLLR		spALBU_BOVIN|	3	1	0	480.609	1439.81	1439.81	-0.01	-1e-05	11.9087	29943	4.85
Input	KVPQVSTPTLVEVSR		spALBU_BOVIN|; spALBU_HUMAN|	3	1	0	547.319	1639.94	1639.94	2.03	0.00111	18.3859	29383	4.85
Input	SHcIAEVEKDAIPENLPPLTADFAEDKDVcK	C3(Carbamidomethyl); C30(Carbamidomethyl)	spALBU_BOVIN|	3	1	0	1171.23	3511.68	3511.67	2.23	0.00261	0	38248	4.84
Input	kNLIGALLFDSGETAEATR	K1(DSSO:H2O)	Cas9	3	0.911	0	728.029	2182.07	2182.07	0.69	0.00051	0	52297	4.83
Input	RHPYFYAPELLYYANK		spALBU_BOVIN|	3	0.9274	0	682.348	2045.03	2045.03	0.04	3e-05	8.91375	41901	4.82
Input	RHPYFYAPELLYYANK		spALBU_BOVIN|	4	0.8505	0	512.012	2045.03	2045.03	-0.23	-0.00012	0	39604	4.75
Input	MTNFDKNLPNEK		Cas9	3	0.8835	0	484.238	1450.7	1450.7	-0.21	-0.0001	70.8108	23644	4.72
Input	RHPYFYAPELLYYANK		spALBU_BOVIN|	3	1	0	682.348	2045.03	2045.03	1.12	0.00076	7.75792	62467	4.7
Input	VNTEITKAPLSASMIK		Cas9	3	1	0	568.319	1702.94	1702.94	0.82	0.00046	30.5841	30270	4.65
Input	LESEFVYGDYKVYDVR		Cas9	3	0.9231	0	661.323	1981.95	1981.95	0.31	0.00021	23.6962	36008	4.55
Input	kSEETITPWNFEEVVDK	K1(DSSO:H2O)	Cas9	3	0.7335	0	743.009	2227.01	2227.01	1.06	0.00078	22.7386	45641	4.54
Input	GLVLIAFSQYLQQcPFDEHVK	C14(Carbamidomethyl)	spALBU_BOVIN|	3	1	0	831.428	2492.27	2492.26	1.77	0.00147	51.164	52257	4.38
Input	RHPEYAVSVLLR		spALBU_BOVIN|	3	1	0	480.608	1439.81	1439.81	-0.71	-0.00034	54.9335	31423	4.37
Input	KSEETITPWNFEEVVDK		Cas9	3	0.6736	0	684.34	2051.01	2051	4.18	0.00286	21.3678	41465	4.32
Input	RHPYFYAPELLYYANK		spALBU_BOVIN|	4	0.877	0	512.013	2045.03	2045.03	0.61	0.00031	14.426	39152	4.31
Input	SHcIAEVEKDAIPENLPPLTADFAEDKDVcK	C3(Carbamidomethyl); C30(Carbamidomethyl)	spALBU_BOVIN|	4	1	0	878.675	3511.68	3511.67	1.89	0.00166	42.4236	38144	4.25
Input	LKTYAHLFDDK		Cas9	3	0.8467	0	450.907	1350.71	1350.71	0.46	0.00021	26.8575	26851	4.24
Input	HLVDEPQNLIK		spALBU_BOVIN|	3	0.7923	0	435.911	1305.72	1305.72	0.75	0.00033	59.1922	27315	4.14
Input	HkPENIVIEMAR	K2(DSSO:H2O)	Cas9	3	0.8337	0	538.266	1612.78	1612.78	0.32	0.00017	33.3543	29717	4.09
Input	RHPEYAVSVLLR		spALBU_BOVIN|	3	1	0	480.609	1439.81	1439.81	-0.2	-0.0001	0	34133	4.08
Input	HkPENIVIEMAR	K2(DSSO:H2O)	Cas9	3	0.8993	0	538.266	1612.78	1612.78	0.66	0.00035	17.367	30755	4.07
Input	YPkLESEFVYGDYK	K3(DSSO:H2O)	Cas9	3	0.9951	0	638.622	1913.85	1913.85	0.06	4e-05	0	39651	4.06
Input	YDEHHQDLTLLK		Cas9	3	0.6519	0	504.587	1511.75	1511.75	-0.87	-0.00044	4.05973	25543	4.05
Input	RHPYFYAPELLYYANK		spALBU_BOVIN|	3	0.8719	0	682.347	2045.03	2045.03	-0.67	-0.00046	21.0453	42918	3.98
Input	EccHGDLLEcADDR	C2(Carbamidomethyl); C3(Carbamidomethyl); C10(Carbamidomethyl)	spALBU_BOVIN|	3	1	0	583.892	1749.66	1749.66	-0.67	-0.00039	38.166	24351	3.96
Input	LEESFLVEEDKK		Cas9	3	0.9671	0	489.252	1465.74	1465.74	0.61	0.0003	3.48299	28368	3.95
Input	SSFEkNPIDFLEAK	K5(DSSO:H2O)	Cas9	3	0.7975	0	600.951	1800.84	1800.84	0.5	0.0003	0	44517	3.95
Input	RHPYFYAPELLYYANK		spALBU_BOVIN|	3	0.957	0	682.348	2045.03	2045.03	0.58	0.0004	33.827	40788	3.95
Input	kNLIGALLFDSGETAEATR	K1(DSSO:H2O)	Cas9	3	0.9082	0	728.029	2182.07	2182.07	0.86	0.00063	0	52686	3.92
Input	VNTEITkAPLSASMIK	K7(DSSO:H2O)	Cas9	3	0.7051	0	626.99	1878.96	1878.96	0.55	0.00035	0	35363	3.9
Input	VNTEITkAPLSASmIK	K7(DSSO:H2O); M14(Oxidation)	Cas9	3	0.9434	0	632.322	1894.95	1894.95	0.4	0.00025	71.9879	31268	3.89
Input	LKEccDKPLLEK	C4(Carbamidomethyl); C5(Carbamidomethyl)	spALBU_BOVIN|	3	0.7629	0	511.598	1532.78	1532.78	-0.86	-0.00044	1.51685	19967	3.88
Input	RPcFSALTPDETYVPK	C3(Carbamidomethyl)	spALBU_BOVIN|	3	0.9302	0	627.645	1880.92	1880.92	0.17	0.0001	77.8629	31994	3.87
Input	DDPHAcYSTVFDK	C6(Carbamidomethyl)	spALBU_BOVIN|	3	0.9267	0	518.889	1554.65	1554.65	0	0	46.6208	27180	3.82
Input	RHPEYAVSVLLR		spALBU_BOVIN|	3	1	0	480.609	1439.81	1439.81	0.37	0.00018	26.9677	31902	3.82
Input	RHPYFYAPELLYYANK		spALBU_BOVIN|	3	1	0	682.348	2045.03	2045.03	0.67	0.00046	0	62204	3.79
Input	LKPDPNTLcDEFK	C9(Carbamidomethyl)	spALBU_BOVIN|	3	0.7599	0	526.26	1576.77	1576.77	-0.75	-0.00039	23.2578	29670	3.79
Input	RHPEYAVSVLLR		spALBU_BOVIN|	3	1	0	480.609	1439.81	1439.81	-0.2	-0.0001	16.9304	62267	3.78
Input	LPkYSLFELENGR	K3(DSSO:H2O)	Cas9	3	1	0	581.287	1741.85	1741.85	0.66	0.00038	3.63938	42086	3.78
Input	TYAHLFDDKVMK		Cas9	3	0.7185	0	489.916	1467.73	1467.73	1.96	0.00096	28.6186	28305	3.73
Input	RHPEYAVSVLLR		spALBU_BOVIN|	3	1	0	480.609	1439.81	1439.81	-0.27	-0.00013	23.4338	62534	3.7
Input	RHPYFYAPELLYYANK		spALBU_BOVIN|	4	0.9066	0	512.012	2045.03	2045.03	-0.35	-0.00018	12.5911	40044	3.64
Input	kNLIGALLFDSGETAEATR	K1(DSSO:H2O)	Cas9	3	1	0	728.031	2182.08	2182.07	4.64	0.00337	81.6274	48625	3.63
Input	LEESFLVEEDkK	K11(DSSO:H2O)	Cas9	3	0.0937	0	547.924	1641.76	1641.76	0.66	0.00036	4.31463	32733	3.63
Input	IEEGIkELGSQILK	K6(DSSO:H2O)	Cas9	3	0.6851	0	578.307	1732.91	1732.9	0.84	0.00049	10.2499	42214	3.62
Input	RHPEYAVSVLLR		spALBU_BOVIN|	3	1	0	480.609	1439.81	1439.81	-0.46	-0.00022	0	33697	3.61
Input	MLASAGELQkGNELALPSK	K10(DSSO:H2O)	Cas9	3	0.4444	0	711.689	2133.05	2133.06	-1.83	-0.0013	14.6907	34903	3.6
Input	LENLIAQLPGEKK		Cas9	3	1	0	484.952	1452.84	1452.84	0.52	0.00025	0	33220	3.59
Input	mLASAGELQkGNELALPSK	M1(Oxidation); K10(DSSO:H2O)	Cas9	3	0.5182	0	717.022	2149.05	2149.05	-0.42	-0.0003	10.5406	33023	3.57
Input	HKPENIVIEMAR		Cas9	3	0.8599	0	479.594	1436.77	1436.77	-0.93	-0.00044	36.8451	25968	3.57
Input	RHPEYAVSVLLR		spALBU_BOVIN|	3	1	0	480.609	1439.81	1439.81	0.31	0.00015	41.7381	43025	3.56
Input	IITHPNFNGNTLDNDIMLIK		spTRYP_PIG|	3	0.7275	0	761.733	2283.18	2283.18	1.43	0.00109	41.1568	41254	3.56
Input	HkPENIVIEmAR	K2(DSSO:H2O); M10(Oxidation)	Cas9	3	0.8644	0	543.597	1628.78	1628.78	0.25	0.00014	6.77702	25113	3.54
Input	RHPEYAVSVLLR		spALBU_BOVIN|	3	1	0	480.609	1439.81	1439.81	0.18	9e-05	61.8383	35505	3.51
Input	YDEHHQDLTLLK		Cas9	4	0.6724	0	378.693	1511.75	1511.75	0.11	4e-05	0	25541	3.48
Input	HkPENIVIEMAR	K2(DSSO:H2O)	Cas9	3	0.7759	0	538.264	1612.78	1612.78	-3.54	-0.0019	37.2931	33222	3.48
Input	HkPENIVIEMAR	K2(DSSO:H2O)	Cas9	3	0.8555	0	538.266	1612.78	1612.78	0.32	0.00017	0	31628	3.46
Input	VNTEITKAPLSASmIK	M14(Oxidation)	Cas9	3	1	0	573.651	1718.94	1718.94	0.75	0.00043	45.8802	26698	3.46
Input	GLVLIAFSQYLQQcPFDEHVK	C14(Carbamidomethyl)	spALBU_BOVIN|	4	1	0	623.822	2492.27	2492.26	0.32	0.0002	40.3272	52263	3.42
Input	RHPYFYAPELLYYANK		spALBU_BOVIN|	3	0.9795	0	682.348	2045.03	2045.03	0.67	0.00046	58.7305	38897	3.41
Input	RHPEYAVSVLLR		spALBU_BOVIN|	3	1	0	480.609	1439.81	1439.81	0.05	2e-05	43.6851	62020	3.38
Input	KQTALVELLK		spALBU_BOVIN|	3	1	0	381.576	1142.71	1142.71	-0.33	-0.00012	0	32318	3.36
Input	HPYFYAPELLYYANK		spALBU_BOVIN|	3	1	0	630.313	1888.93	1888.93	-0.8	-0.00051	12.1682	43379	3.34
Input	RHPEYAVSVLLR		spALBU_BOVIN|	3	1	0	480.609	1439.81	1439.81	-0.27	-0.00013	46.9988	32380	3.33
Input	MLASAGELQkGNELALPSK	K10(DSSO:H2O)	Cas9	3	0.5602	0	711.692	2133.06	2133.06	1.86	0.00132	11.3804	35428	3.32
Input	RHPYFYAPELLYYANK		spALBU_BOVIN|	3	1	0	682.347	2045.03	2045.03	-1.12	-0.00076	77.9768	61973	3.32
Input	QEDFYPFLKDNR		Cas9	3	0.8036	0	524.588	1571.75	1571.75	0.62	0.00032	21.7736	34818	3.31
Input	YDEHHQDLTLLkALVR	K12(DSSO:H2O)	Cas9	4	1	0	532.519	2127.05	2127.05	0.32	0.00017	5.25088	42925	3.31
Input	HkPENIVIEmAR	K2(DSSO:H2O); M10(Oxidation)	Cas9	3	0.9061	0	543.597	1628.78	1628.78	-0.31	-0.00017	25.4882	30751	3.3
Input	SHcIAEVEKDAIPENLPPLTADFAEDKDVcK	C3(Carbamidomethyl); C30(Carbamidomethyl)	spALBU_BOVIN|	5	1	0	703.14	3511.67	3511.67	-0.11	-8e-05	28.718	38137	3.28
Input	YDEHHQDLTLLkALVR	K12(DSSO:H2O)	Cas9	3	1	0	709.691	2127.06	2127.05	1.5	0.00106	9.37629	42514	3.28
Input	LESEFVYGDYkVYDVR	K11(DSSO:H2O)	Cas9	3	0.7988	0	719.995	2157.97	2157.97	0.97	0.0007	24.0219	40165	3.28
Input	RHPEYAVSVLLR		spALBU_BOVIN|	3	1	0	480.609	1439.81	1439.81	1.2	0.00057	9.61541	41573	3.26
Input	FKDLGEEHFK		spALBU_BOVIN|	3	0.9537	0	417.212	1249.62	1249.62	-0.05	-2e-05	43.6129	22522	3.24
Input	RHPEYAVSVLLR		spALBU_BOVIN|	3	1	0	480.609	1439.81	1439.81	-0.27	-0.00013	21.1827	57623	3.2
Input	SVKELLGITIMER		Cas9	3	0.8997	0	496.953	1488.85	1488.85	-0.16	-8e-05	53.5019	40542	3.19
Input	RHPEYAVSVLLR		spALBU_BOVIN|	3	1	0	480.609	1439.81	1439.81	-0.46	-0.00022	57.8351	46664	3.19
Input	RHPEYAVSVLLR		spALBU_BOVIN|	3	1	0	480.608	1439.81	1439.81	-0.84	-0.0004	56.5373	46215	3.18
Input	HKPENIVIEMAR		Cas9	3	0.8931	0	479.594	1436.77	1436.77	-0.35	-0.00017	16.1309	26357	3.18
Input	RHPEYAVSVLLR		spALBU_BOVIN|	3	1	0	480.609	1439.81	1439.81	-0.27	-0.00013	33.2849	35051	3.18
Input	RHPEYAVSVLLR		spALBU_BOVIN|	3	1	0	480.609	1439.81	1439.81	0.18	9e-05	0	56760	3.16
Input	GKSDNVPSEEVVK		Cas9	3	1	0	463.24	1387.71	1387.71	0.05	3e-05	8.08846	19414	3.14
Input	TYAHLFDDkVmK	K9(DSSO:H2O); M11(Oxidation)	Cas9	3	0.0064	0	553.918	1659.74	1659.74	0.03	2e-05	0	34367	3.14
Input	RHPEYAVSVLLR		spALBU_BOVIN|	3	1	0	480.609	1439.81	1439.81	0.43	0.00021	29.3078	42045	3.14
Input	GGLSELDKAGFIK		Cas9	3	1	0	445.582	1334.73	1334.73	-1.09	-0.00049	15.1419	32842	3.13
Input	TYAHLFDDKVmk	M11(Oxidation); K12(DSSO:H2O)	Cas9	3		0.0064	553.918	1659.74	1659.74	0.03	2e-05	0	34367	3.12
Input	RHPEYAVSVLLR		spALBU_BOVIN|	3	1	0	480.609	1439.81	1439.81	0.62	0.0003	40.3753	33048	3.12
Input	RHPYFYAPELLYYANK		spALBU_BOVIN|	4	0.7244	0	512.012	2045.03	2045.03	-0.71	-0.00036	62.7088	40552	3.12
Input	HkPENIVIEMAR	K2(DSSO:H2O)	Cas9	3	0.871	0	538.265	1612.78	1612.78	-1.16	-0.00062	67.2055	32177	3.1
Input	RHPEYAVSVLLR		spALBU_BOVIN|	3	1	0	480.609	1439.81	1439.81	0.88	0.00042	34.4924	41123	3.1
Input	LENLIAQLPGEKk	K13(DSSO:H2O)	Cas9	3	0.0326	0	543.624	1628.86	1628.86	0.47	0.00026	9.82359	37089	3.07
Input	MIAKSEQEIGK		Cas9	3	0.8925	0	411.888	1233.65	1233.65	0.06	2e-05	27.0299	17687	3.07
Input	MDGTEELLVkLNR	K10(DSSO:H2O)	Cas9	3	0.7941	0	565.277	1693.82	1693.81	1.36	0.00077	0.146216	41117	3.06
Input	HKPENIVIEmAR	M10(Oxidation)	Cas9	3	1	0	484.926	1452.76	1452.76	-0.29	-0.00014	0	20197	3.04
Input	mLASAGELQkGNELALPSK	M1(Oxidation); K10(DSSO:H2O)	Cas9	3	0.967	0	717.021	2149.05	2149.05	-0.76	-0.00054	20.9923	36081	3.03
Input	TEVQTGGFSkESILPK	K10(DSSO:H2O)	Cas9	3	0.5314	0	632.981	1896.93	1896.93	0.68	0.00043	18.9166	35153	3.03
Input	MDGTEELLVkLNR	K10(DSSO:H2O)	Cas9	3	0.8278	0	565.276	1693.81	1693.81	0.6	0.00034	14.0715	41568	3.02
Input	QEDFYPFLkDNR	K9(DSSO:H2O)	Cas9	3	1	0	583.26	1747.77	1747.76	1.19	0.00069	44.3508	39595	3.02
Input	RHPEYAVSVLLR		spALBU_BOVIN|	3	1	0	480.609	1439.81	1439.81	-0.39	-0.00019	60.5878	39582	3.02
Input	RHPEYAVSVLLR		spALBU_BOVIN|	3	1	0	480.608	1439.81	1439.81	-1.09	-0.00052	17.5048	58555	3.01
Input	LKPDPNTLcDEFKADEK	C9(Carbamidomethyl)	spALBU_BOVIN|	4	0.7033	0	505.748	2019.97	2019.97	0.58	0.00029	22.7534	29187	3
Input	KVPQVSTPTLVEVSR		spALBU_BOVIN|; spALBU_HUMAN|	3	0.9599	0	547.318	1639.94	1639.94	1.25	0.00068	50.0835	61802	2.99
Input	NEcFLSHKDDSPDLPK	C3(Carbamidomethyl)	spALBU_BOVIN|	3	0.9899	0	634.627	1901.87	1901.87	-1.45	-0.00092	0	25266	2.98
Input	RHPYFYAPELLYYANK		spALBU_BOVIN|	3	0.9228	0	682.347	2045.03	2045.03	-0.76	-0.00052	78.0033	45091	2.98
Input	LENLIAQLPGEkK	K12(DSSO:H2O)	Cas9	3		0.0326	543.624	1628.86	1628.86	0.47	0.00026	9.82359	37089	2.97
Input	TILDFLkSDGFANR	K7(DSSO:H2O)	Cas9	3	1	0	591.622	1772.85	1772.85	0.33	0.00019	2.443	48293	2.97
Input	LFTFHADIcTLPDTEK	C9(Carbamidomethyl)	spALBU_BOVIN|	3	1	0	636.644	1907.92	1907.92	-2.06	-0.00131	20.4887	38360	2.97
Input	HKPENIVIEMAR		Cas9	3	0.8485	0	479.594	1436.77	1436.77	0.41	0.0002	46.6393	26735	2.97
Input	GLVLIAFSQYLQQcPFDEHVK	C14(Carbamidomethyl)	spALBU_BOVIN|	3	1	0	831.427	2492.27	2492.26	0.52	0.00043	2.93818	53039	2.97
Input	MLASAGELQkGNELALPSK	K10(DSSO:H2O)	Cas9	3	0.4459	0	711.691	2133.06	2133.06	1.09	0.00077	17.5576	34100	2.96
Input	LKGSPEDNEQK		Cas9	3	1	0	415.542	1244.61	1244.61	-0.61	-0.00025	26.4464	6417	2.95
Input	RHPEYAVSVLLR		spALBU_BOVIN|	3	1	0	480.609	1439.81	1439.81	0.24	0.00012	60.0174	40027	2.94
Input	YDEHHQDLTLLkALVR	K12(DSSO:H2O)	Cas9	3	1	0	709.69	2127.06	2127.05	0.64	0.00045	16.0333	43519	2.94
Input	NEcFLSHKDDSPDLPK	C3(Carbamidomethyl)	spALBU_BOVIN|	4	0.8231	0	476.223	1901.87	1901.87	0.63	0.0003	14.569	25263	2.94
Input	RHPYFYAPELLYYANK		spALBU_BOVIN|	3	0.9352	0	682.348	2045.03	2045.03	0.13	9e-05	44.2194	41448	2.93
Input	RHPEYAVSVLLR		spALBU_BOVIN|	3	1	0	480.609	1439.81	1439.81	-0.27	-0.00013	0	58022	2.91
Input	SDNVPSEEVVkK	K11(DSSO:H2O)	Cas9	3	0.0893	0	502.905	1506.7	1506.7	0.39	0.0002	14.2313	22905	2.91
Input	RHPYFYAPELLYYANK		spALBU_BOVIN|	3	0.9416	0	682.347	2045.03	2045.03	-0.67	-0.00046	72.341	43541	2.91
Input	SNFDLAEDAkLQLSK	K10(DSSO:H2O)	Cas9	3	0.4586	0	618.965	1854.88	1854.88	0.44	0.00027	64.9697	40724	2.9
Input	VHKEccHGDLLEcADDR	C5(Carbamidomethyl); C6(Carbamidomethyl); C13(Carbamidomethyl)	spALBU_BOVIN|	4	1	0	529.226	2113.88	2113.88	-1.11	-0.00059	0	20672	2.89
Input	RHPEYAVSVLLR		spALBU_BOVIN|	3	1	0	480.608	1439.81	1439.81	-0.58	-0.00028	47.9579	47094	2.88
Input	SSFEKNPIDFLEAK		Cas9	3	0.7875	0	542.279	1624.82	1624.82	0.1	5e-05	0	38606	2.87
Input	RPcFSALTPDETYVPK	C3(Carbamidomethyl)	spALBU_BOVIN|	3	1	0	627.646	1880.92	1880.92	1.43	0.0009	36.5127	61810	2.87
Input	RHPYFYAPELLYYANK		spALBU_BOVIN|	3	0.77	0	682.349	2045.03	2045.03	2.19	0.0015	21.1023	44625	2.87
Input	RHPEYAVSVLLR		spALBU_BOVIN|	3	1	0	480.609	1439.81	1439.81	-0.33	-0.00016	43.1078	42568	2.86
Input	HkPENIVIEmAR	K2(DSSO:H2O); M10(Oxidation)	Cas9	3	0.7817	0	543.597	1628.78	1628.78	0.25	0.00014	0	31274	2.84
Input	TILDFLKSDGFANR		Cas9	3	1	0	532.951	1596.84	1596.84	0.47	0.00025	7.76433	45920	2.84
Input	RHPYFYAPELLYYANK		spALBU_BOVIN|	3	0.8763	0	682.348	2045.03	2045.03	0.4	0.00027	31.6563	59002	2.83
Input	RHPEYAVSVLLR		spALBU_BOVIN|	3	1	0	480.609	1439.81	1439.81	-0.46	-0.00022	29.3363	40631	2.83
Input	TILDFLkSDGFANR	K7(DSSO:H2O)	Cas9	3	1	0	591.623	1772.85	1772.85	0.43	0.00025	67.5	42898	2.82
Input	LKPDPNTLcDEFKADEK	C9(Carbamidomethyl)	spALBU_BOVIN|	3	0.8262	0	673.995	2019.97	2019.97	0.8	0.00054	13.9699	29238	2.82
Input	RHPEYAVSVLLR		spALBU_BOVIN|	3	1	0	480.609	1439.81	1439.81	-0.08	-4e-05	12.9065	50813	2.82
Input	RHPYFYAPELLYYANK		spALBU_BOVIN|	3	1	0	682.348	2045.03	2045.03	1.21	0.00082	73.4951	46441	2.82
Input	HkPENIVIEmAR	K2(DSSO:H2O); M10(Oxidation)	Cas9	3	0.7473	0	543.597	1628.78	1628.78	-0.31	-0.00017	29.3945	24721	2.81
Input	VSFELFADKVPK		spPPIA_HUMAN|	3	1	0	460.591	1379.76	1379.76	0.05	2e-05	33.0791	38132	2.81
Input	RHPYFYAPELLYYANK		spALBU_BOVIN|	3	0.9785	0	682.348	2045.03	2045.03	0.31	0.00021	25.1093	58278	2.79
Input	mTNFDkNLPNEK	M1(Oxidation); K6(DSSO:H2O)	Cas9	3	0.6918	0	548.241	1642.71	1642.71	-0.12	-7e-05	28.2677	25932	2.79
Input	MPcTEDYLSLILNR	C3(Carbamidomethyl)	spALBU_BOVIN|	3	0.9568	0	575.617	1724.84	1724.83	0.23	0.00013	26.8946	49929	2.78
Input	RHPEYAVSVLLR		spALBU_BOVIN|	3	1	0	480.608	1439.81	1439.81	-0.58	-0.00028	33.3426	48814	2.78
Input	mPcTEDYLSLILNR	M1(Oxidation); C3(Carbamidomethyl)	spALBU_BOVIN|	3	0.9382	0	580.949	1740.83	1740.83	1.11	0.00065	0	47537	2.75
Input	MPcTEDYLSLILNR	C3(Carbamidomethyl)	spALBU_BOVIN|	3	0.9491	0	575.617	1724.84	1724.83	0.33	0.00019	5.05567	49544	2.75
Input	TYAHLFDDkVMK	K9(DSSO:H2O)	Cas9	3	0.1606	0	548.587	1643.75	1643.74	0.98	0.00054	25.0623	32247	2.74
Input	RHPYFYAPELLYYANK		spALBU_BOVIN|	3	1	0	682.349	2045.03	2045.03	2.82	0.00192	31.0586	44091	2.73
Input	RHPEYAVSVLLR		spALBU_BOVIN|	3	1	0	480.609	1439.81	1439.81	0.43	0.00021	56.6854	44403	2.73
Input	NFmQLIHDDSLTFkEDIQK	M3(Oxidation); K14(DSSO:H2O)	Cas9	3	0.5294	0	838.724	2514.16	2514.15	1.81	0.00152	11.9598	45385	2.72
Input	YDEHHQDLTLLkALVR	K12(DSSO:H2O)	Cas9	4	1	0	532.519	2127.05	2127.05	0.2	0.00011	14.7495	42456	2.72
Input	RHPEYAVSVLLR		spALBU_BOVIN|	3	1	0	480.608	1439.81	1439.81	-0.78	-0.00037	57.8274	49634	2.69
Input	ADLEMQIESLTEELAYLKK		spK1C10_HUMAN|	4	0.829	0	556.788	2224.13	2224.14	-4.82	-0.00268	26.7891	24655	2.69
Input	RHPEYAVSVLLR		spALBU_BOVIN|	3	1	0	480.609	1439.81	1439.81	-0.01	-1e-05	61.8361	55691	2.68
Input	SDNVPSEEVVKK		Cas9	3	0.8985	0	444.233	1330.69	1330.68	0.36	0.00016	0	18967	2.66
Input	YPkLESEFVYGDYK	K3(DSSO:H2O)	Cas9	3	1	0	638.623	1913.85	1913.85	1.02	0.00065	64.3862	39183	2.65
Input	TILDFLkSDGFANR	K7(DSSO:H2O)	Cas9	3	1	0	591.623	1772.85	1772.85	0.53	0.00031	3.50843	49909	2.64
Input	RHPYFYAPELLYYANK		spALBU_BOVIN|	4	0.9167	0	512.012	2045.03	2045.03	-0.11	-6e-05	14.1654	42706	2.64
Input	RHPEYAVSVLLR		spALBU_BOVIN|	3	1	0	480.609	1439.81	1439.81	-0.27	-0.00013	0	50439	2.62
Input	IEDGFSLKEQLQDMGLVDLFSPEKSK		spANT3_HUMAN|	4	0.2901	0	739.132	2953.51	2953.49	6.5	0.0048	0	38982	2.62
Input	LKTYAHLFDDK		Cas9	3	0.7165	0	450.907	1350.71	1350.71	1.95	0.00088	74.5323	25594	2.61
Input	RHPEYAVSVLLR		spALBU_BOVIN|	3	1	0	480.608	1439.81	1439.81	-0.71	-0.00034	0	54551	2.61
Input	TILDFLkSDGFANR	K7(DSSO:H2O)	Cas9	3	1	0	591.623	1772.85	1772.85	0.64	0.00038	7.13622	49527	2.6
Input	RHPEYAVSVLLR		spALBU_BOVIN|	3	1	0	480.609	1439.81	1439.81	0.69	0.00033	0	45760	2.6
Input	RHPEYAVSVLLR		spALBU_BOVIN|	3	1	0	480.609	1439.81	1439.81	0.75	0.00036	47.7176	36206	2.59
Input	TILDFLkSDGFANR	K7(DSSO:H2O)	Cas9	3	0.93	0	591.622	1772.85	1772.85	-0.4	-0.00023	64.2642	50323	2.57
Input	GGLSELDkAGFIK	K8(DSSO:H2O)	Cas9	3	0.293	0	504.254	1510.75	1510.75	0.56	0.00028	24.4157	37895	2.56
Input	mLASAGELQkGNELALPSK	M1(Oxidation); K10(DSSO:H2O)	Cas9	3	0.2047	0	717.022	2149.05	2149.05	0.09	7e-05	0	37273	2.54
Input	LkTYAHLFDDK	K2(DSSO:H2O)	Cas9	3	0.7677	0	509.579	1526.72	1526.72	2.03	0.00103	0	32244	2.54
Input	MLASAGELQkGNELALPSK	K10(DSSO:H2O)	Cas9	3	0.3968	0	711.691	2133.06	2133.06	1.26	0.00089	22.9452	39168	2.52
Input	kSEETITPWNFEEVVDK	K1(DSSO:H2O)	Cas9	3	0.9921	0	743.006	2227	2227.01	-3.3	-0.00245	85.8907	40819	2.52
Input	RHPEYAVSVLLR		spALBU_BOVIN|	3	1	0	480.608	1439.81	1439.81	-0.84	-0.0004	31.0959	44852	2.5
Input	DLIIKLPkYSLFELENGR	K8(DSSO:Tris)	Cas9	3	0.152	0	809.769	2427.29	2427.28	3.92	0.00317	28.5142	46662	2.5
Input	RHPEYAVSVLLR		spALBU_BOVIN|	3	1	0	480.609	1439.81	1439.81	0.43	0.00021	54.244	47524	2.47
Input	RHPYFYAPELLYYANK		spALBU_BOVIN|	3	1	0	682.347	2045.03	2045.03	-0.58	-0.0004	79.6538	47347	2.47
Input	RHPYFYAPELLYYANK		spALBU_BOVIN|	3	1	0	682.349	2045.03	2045.03	1.84	0.00125	33.1795	52628	2.45
Input	TYAHLFDDKVmK	M11(Oxidation)	Cas9	3	0.8525	0	495.246	1483.72	1483.72	-1.09	-0.00054	82.3757	25319	2.44
Input	NLIGALLFDSGETAEATR		Cas9	3	0.8025	0	626.658	1877.96	1877.96	-0.73	-0.00046	46.3584	50990	2.43
Input	RHPEYAVSVLLR		spALBU_BOVIN|	3	1	0	480.609	1439.81	1439.81	-0.14	-7e-05	0	53806	2.43
Input	RHPYFYAPELLYYANK		spALBU_BOVIN|	3	1	0	682.348	2045.03	2045.03	0.13	9e-05	38.5832	53683	2.42
Input	RHPEYAVSVLLR		spALBU_BOVIN|	3	1	0	480.609	1439.81	1439.81	0.12	6e-05	39.162	48379	2.42
Input	MPcTEDYLSLILNR	C3(Carbamidomethyl)	spALBU_BOVIN|	3	0.917	0	575.617	1724.84	1724.83	0.23	0.00013	8.44727	44640	2.41
Input	RHPEYAVSVLLR		spALBU_BOVIN|	3	1	0	480.609	1439.81	1439.81	-0.46	-0.00022	38.2642	43953	2.39
Input	TcVADESHAGcEK	C2(Carbamidomethyl); C11(Carbamidomethyl)	spALBU_BOVIN|	3	1	0	488.534	1463.59	1463.59	-0.22	-0.00011	30.6771	12116	2.39
Input	RHPEYAVSVLLR		spALBU_BOVIN|	3	1	0	480.609	1439.81	1439.81	0.05	2e-05	0	54933	2.39
Input	RHPEYAVSVLLR		spALBU_BOVIN|	3	1	0	480.609	1439.81	1439.81	0.24	0.00012	24.9446	38572	2.38
Input	EGHLSPDIVAEQK		spNQO1_HUMAN|	3	0.937	0	474.915	1422.73	1422.72	4.69	0.00222	0	28350	2.38
Input	RHPEYAVSVLLR		spALBU_BOVIN|	3	1	0	480.609	1439.81	1439.81	0.05	2e-05	44.7981	36711	2.36
Input	HkPENIVIEMAR	K2(DSSO:H2O)	Cas9	3	0.8136	0	538.265	1612.78	1612.78	-0.93	-0.0005	53.1493	28191	2.36
Input	LPkYSLFELENGR	K3(DSSO:H2O)	Cas9	3	1	0	581.287	1741.85	1741.85	0.55	0.00032	0	42537	2.35
Input	FNASLGTYHDLLK		Cas9	3	0.9787	0	493.593	1478.76	1478.76	-0.03	-1e-05	43.012	34156	2.35
Input	HGGGGGGFGGGGFGSR		spK22E_HUMAN|	3	0.9489	0	440.866	1320.58	1320.58	-0.64	-0.00028	46.6727	21765	2.35
Input	QSGkTILDFLK	K4(DSSO:H2O)	Cas9	3	0.7991	0	475.914	1425.73	1425.73	-1.36	-0.00065	42.9429	43885	2.34
Input	LkTYAHLFDDK	K2(DSSO:H2O)	Cas9	3	0.8632	0	509.579	1526.72	1526.72	1.91	0.00097	16.9009	30760	2.34
Input	RHPYFYAPELLYYANK		spALBU_BOVIN|	3	1	0	682.349	2045.03	2045.03	1.92	0.00131	38.0174	53239	2.34
Input	MTNFDkNLPNEK	K6(DSSO:H2O)	Cas9	3	0.7564	0	542.911	1626.72	1626.71	2.53	0.00137	35.3509	27854	2.34
Input	TYAHLFDDkVMK	K9(DSSO:H2O)	Cas9	3	0.1853	0	548.587	1643.75	1643.74	0.76	0.00042	20.6669	32919	2.32
Input	mDGTEELLVkLNR	M1(Oxidation); K10(DSSO:H2O)	Cas9	3	0.5974	0	570.608	1709.81	1709.81	0.53	0.0003	28.1047	38295	2.31
Input	NPIDFLEAkGYK	K9(DSSO:H2O)	Cas9	3	0.2857	0	524.254	1570.75	1570.75	0.77	0.0004	0	40864	2.31
DSSO_Eluate_Streptavidin	ATEEQLKTVMENFVAFVDK		spALBU_BOVIN|	3	0.8311	0	733.706	2199.1	2199.1	1.47	0.00108	30.2799	52419	8.17
DSSO_Eluate_Streptavidin	QNcDQFEKLGEYGFQNALIVR	C3(Carbamidomethyl)	spALBU_BOVIN|	4	0.8471	0	633.061	2529.22	2529.22	0.7	0.00044	0	40721	7.39
DSSO_Eluate_Streptavidin	NYQEAKDAFLGSFLYEYSR		spALBU_BOVIN|	3	0.951	0	767.7	2301.08	2301.08	0.77	0.00059	0	42950	7.15
DSSO_Eluate_Streptavidin	NYQEAKDAFLGSFLYEYSR		spALBU_BOVIN|	3	0.9228	0	767.699	2301.08	2301.08	-0.26	-0.0002	0	44257	7.12
DSSO_Eluate_Streptavidin	ATEEQLKTVmENFVAFVDK	M10(Oxidation)	spALBU_BOVIN|	3	0.9694	0	739.037	2215.1	2215.1	0.92	0.00068	0	42789	6.87
DSSO_Eluate_Streptavidin	LFTFHADIcTLPDTEK	C9(Carbamidomethyl)	spALBU_BOVIN|	3	0.9146	0	636.645	1907.92	1907.92	0.43	0.00028	5.66324	38935	6.79
DSSO_Eluate_Streptavidin	ATEEQLKTVmENFVAFVDK	M10(Oxidation)	spALBU_BOVIN|	3	0.9881	0	739.037	2215.1	2215.1	0.5	0.00037	0	43302	6.72
DSSO_Eluate_Streptavidin	AFDEKLFTFHADIcTLPDTEKQIK	C14(Carbamidomethyl)	spALBU_BOVIN|	3	0.9278	0	956.481	2867.43	2867.43	0.35	0.00034	16.7248	36597	6.65
DSSO_Eluate_Streptavidin	LFTFHADIcTLPDTEK	C9(Carbamidomethyl)	spALBU_BOVIN|	3	0.8907	0	636.646	1907.92	1907.92	1.39	0.00089	25.3407	42740	6.59
DSSO_Eluate_Streptavidin	SHcIAEVEKDAIPENLPPLTADFAEDKDVcK	C3(Carbamidomethyl); C30(Carbamidomethyl)	spALBU_BOVIN|	3	0.8015	0	1171.23	3511.67	3511.67	-0.48	-0.00057	16.2162	35859	6.55
DSSO_Eluate_Streptavidin	LFTFHADIcTLPDTEK	C9(Carbamidomethyl)	spALBU_BOVIN|	3	0.9037	0	636.645	1907.92	1907.92	0.53	0.00034	2.62608	35832	6.54
DSSO_Eluate_Streptavidin	GLVLIAFSQYLQQcPFDEHVK	C14(Carbamidomethyl)	spALBU_BOVIN|	3	1	0	831.428	2492.27	2492.26	1.84	0.00153	0	50055	6.52
DSSO_Eluate_Streptavidin	LFTFHADIcTLPDTEK	C9(Carbamidomethyl)	spALBU_BOVIN|	3	0.9275	0	636.646	1907.92	1907.92	0.82	0.00052	15.6534	38033	6.48
DSSO_Eluate_Streptavidin	TVMENFVAFVDKccAADDKEAcFAVEGPK	C13(Carbamidomethyl); C14(Carbamidomethyl); C22(Carbamidomethyl)	spALBU_BOVIN|	3	0.837	0	1103.49	3308.46	3308.47	-3.9	-0.0043	22.9711	43757	6.38
DSSO_Eluate_Streptavidin	LGEHNIDVLEGNEQFINAAK		spTRYP_PIG|	3	0.9953	0	737.705	2211.1	2211.1	-1.19	-0.00087	66.1863	34249	6.37
DSSO_Eluate_Streptavidin	LFTFHADIcTLPDTEK	C9(Carbamidomethyl)	spALBU_BOVIN|	3	0.9465	0	636.645	1907.92	1907.92	0.43	0.00028	9.44933	37569	6.35
DSSO_Eluate_Streptavidin	LFTFHADIcTLPDTEK	C9(Carbamidomethyl)	spALBU_BOVIN|	3	0.8991	0	636.646	1907.92	1907.92	1.2	0.00076	0.720792	36259	6.34
DSSO_Eluate_Streptavidin	LFTFHADIcTLPDTEK	C9(Carbamidomethyl)	spALBU_BOVIN|	3	1	0	636.645	1907.92	1907.92	-0.72	-0.00046	0	36716	6.29
DSSO_Eluate_Streptavidin	LFTFHADIcTLPDTEK	C9(Carbamidomethyl)	spALBU_BOVIN|	3	0.9491	0	636.646	1907.92	1907.92	1.97	0.00125	15.8969	35413	6.29
DSSO_Eluate_Streptavidin	TVmENFVAFVDKccAADDKEAcFAVEGPK	M3(Oxidation); C13(Carbamidomethyl); C14(Carbamidomethyl); C22(Carbamidomethyl)	spALBU_BOVIN|	3	0.8463	0	1108.83	3324.48	3324.47	2.21	0.00244	3.76587	37630	6.18
DSSO_Eluate_Streptavidin	LFTFHADIcTLPDTEK	C9(Carbamidomethyl)	spALBU_BOVIN|	3	0.9092	0	636.646	1907.92	1907.92	0.82	0.00052	0	39895	6.17
DSSO_Eluate_Streptavidin	GLVLIAFSQYLQQcPFDEHVK	C14(Carbamidomethyl)	spALBU_BOVIN|	4	1	0	623.822	2492.27	2492.26	0.51	0.00032	21.9577	49974	6.14
DSSO_Eluate_Streptavidin	TVmENFVAFVDKccAADDKEAcFAVEGPK	M3(Oxidation); C13(Carbamidomethyl); C14(Carbamidomethyl); C22(Carbamidomethyl)	spALBU_BOVIN|	4	0.8644	0	831.874	3324.47	3324.47	1.74	0.00145	5.17902	37607	6.12
DSSO_Eluate_Streptavidin	LFTFHADIcTLPDTEK	C9(Carbamidomethyl)	spALBU_BOVIN|	3	0.8905	0	636.646	1907.92	1907.92	1.78	0.00113	8.44496	37132	6.12
DSSO_Eluate_Streptavidin	RHPYFYAPELLYYANK		spALBU_BOVIN|	3	0.9852	0	682.348	2045.03	2045.03	1.03	0.0007	5.40978	37341	6.07
DSSO_Eluate_Streptavidin	GLVLIAFSQYLQQcPFDEHVK	C14(Carbamidomethyl)	spALBU_BOVIN|	3	1	0	831.427	2492.27	2492.26	0.37	0.00031	0	46923	6.04
DSSO_Eluate_Streptavidin	SHcIAEVEKDAIPENLPPLTADFAEDKDVcK	C3(Carbamidomethyl); C30(Carbamidomethyl)	spALBU_BOVIN|	4	1	0	878.675	3511.68	3511.67	1.27	0.00111	0.169511	35984	6.01
DSSO_Eluate_Streptavidin	LFTFHADIcTLPDTEK	C9(Carbamidomethyl)	spALBU_BOVIN|	3	0.9296	0	636.646	1907.92	1907.92	0.82	0.00052	9.88792	40818	5.97
DSSO_Eluate_Streptavidin	RHPYFYAPELLYYANK		spALBU_BOVIN|	3	1	0	682.348	2045.03	2045.03	1.21	0.00082	11.3319	36901	5.96
DSSO_Eluate_Streptavidin	ccTKPESERmPcTEDYLSLILNR	C1(Carbamidomethyl); C2(Carbamidomethyl); M10(Oxidation); C12(Carbamidomethyl)	spALBU_BOVIN|	4	0.8497	0	722.832	2888.31	2888.3	1.11	0.0008	25.7349	38686	5.92
DSSO_Eluate_Streptavidin	GLVLIAFSQYLQQcPFDEHVK	C14(Carbamidomethyl)	spALBU_BOVIN|	4	1	0	623.822	2492.27	2492.26	1	0.00063	0	49549	5.9
DSSO_Eluate_Streptavidin	RHPYFYAPELLYYANK		spALBU_BOVIN|	3	0.959	0	682.348	2045.03	2045.03	0.85	0.00058	12.4294	36494	5.86
DSSO_Eluate_Streptavidin	LFTFHADIcTLPDTEK	C9(Carbamidomethyl)	spALBU_BOVIN|	3	0.9437	0	636.645	1907.92	1907.92	0.24	0.00015	12.7224	41305	5.86
DSSO_Eluate_Streptavidin	LFTFHADIcTLPDTEK	C9(Carbamidomethyl)	spALBU_BOVIN|	3	1	0	636.645	1907.92	1907.92	0.15	9e-05	19.9687	42248	5.85
DSSO_Eluate_Streptavidin	VHKEccHGDLLEcADDRADLAK	C5(Carbamidomethyl); C6(Carbamidomethyl); C13(Carbamidomethyl)	spALBU_BOVIN|	3	0.7869	0	871.394	2612.17	2612.17	0.63	0.00055	39.836	21350	5.82
DSSO_Eluate_Streptavidin	LFTFHADIcTLPDTEK	C9(Carbamidomethyl)	spALBU_BOVIN|	3	0.8881	0	636.646	1907.92	1907.92	0.82	0.00052	18.905	39424	5.81
DSSO_Eluate_Streptavidin	TVMENFVAFVDKccAADDKEAcFAVEGPK	C13(Carbamidomethyl); C14(Carbamidomethyl); C22(Carbamidomethyl)	spALBU_BOVIN|	3	1	0	1103.5	3308.5	3308.47	8.17	0.00901	38.2338	43748	5.76
DSSO_Eluate_Streptavidin	AFDEKLFTFHADIcTLPDTEK	C14(Carbamidomethyl)	spALBU_BOVIN|	3	0.8635	0	833.403	2498.2	2498.19	1.77	0.00147	1.02515	38537	5.64
DSSO_Eluate_Streptavidin	LAKEYEATLEEccAK	C12(Carbamidomethyl); C13(Carbamidomethyl)	spALBU_BOVIN|	3	0.8032	0	605.615	1814.83	1814.83	1.09	0.00066	16.5682	22952	5.59
DSSO_Eluate_Streptavidin	LFTFHADIcTLPDTEK	C9(Carbamidomethyl)	spALBU_BOVIN|	3	0.9533	0	636.646	1907.92	1907.92	0.72	0.00046	11.6166	53736	5.57
DSSO_Eluate_Streptavidin	IITHPNFNGNTLDNDImLIK	M17(Oxidation)	spTRYP_PIG|	3	1	0	767.064	2299.18	2299.18	1.38	0.00105	42.7258	36927	5.56
DSSO_Eluate_Streptavidin	KVPQVSTPTLVEVSR		spALBU_BOVIN|; spALBU_HUMAN|	3	1	0	547.317	1639.94	1639.94	-0.99	-0.00054	49.9001	27995	5.55
DSSO_Eluate_Streptavidin	TVMENFVAFVDKccAADDKEAcFAVEGPK	C13(Carbamidomethyl); C14(Carbamidomethyl); C22(Carbamidomethyl)	spALBU_BOVIN|	4	0.6908	0	827.872	3308.47	3308.47	-1.78	-0.00147	28.0847	43086	5.53
DSSO_Eluate_Streptavidin	KVPQVSTPTLVEVSR		spALBU_BOVIN|; spALBU_HUMAN|	3	1	0	547.317	1639.94	1639.94	-0.43	-0.00023	0	28395	5.53
DSSO_Eluate_Streptavidin	EccHGDLLEcADDRADLAK	C2(Carbamidomethyl); C3(Carbamidomethyl); C10(Carbamidomethyl)	spALBU_BOVIN|	3	1	0	749.987	2247.95	2247.94	1.17	0.00087	11.2171	25079	5.51
DSSO_Eluate_Streptavidin	LFTFHADIcTLPDTEK	C9(Carbamidomethyl)	spALBU_BOVIN|	3	0.9111	0	636.645	1907.92	1907.92	0.24	0.00015	36.1234	41780	5.51
DSSO_Eluate_Streptavidin	SHcIAEVEKDAIPENLPPLTADFAEDKDVcK	C3(Carbamidomethyl); C30(Carbamidomethyl)	spALBU_BOVIN|	4	0.9562	0	878.675	3511.68	3511.67	1.41	0.00123	25.5139	35010	5.48
DSSO_Eluate_Streptavidin	NYQEAKDAFLGSFLYEYSR		spALBU_BOVIN|	3	0.9448	0	767.699	2301.08	2301.08	0.54	0.00041	19.8539	43430	5.43
DSSO_Eluate_Streptavidin	RHPYFYAPELLYYANKYNGVFQEccQAEDK	C24(Carbamidomethyl); C25(Carbamidomethyl)	spALBU_BOVIN|	4	0.9963	0	944.187	3773.72	3773.72	2.48	0.00234	38.7202	41811	5.41
DSSO_Eluate_Streptavidin	RHPYFYAPELLYYANK		spALBU_BOVIN|	4	0.8944	0	512.013	2045.03	2045.03	0.84	0.00043	0	36708	5.4
DSSO_Eluate_Streptavidin	GLVLIAFSQYLQQcPFDEHVK	C14(Carbamidomethyl)	spALBU_BOVIN|	3	1	0	831.428	2492.27	2492.26	1.7	0.00141	0	50370	5.38
DSSO_Eluate_Streptavidin	TVmENFVAFVDKccAADDKEAcFAVEGPK	M3(Oxidation); C13(Carbamidomethyl); C14(Carbamidomethyl); C22(Carbamidomethyl)	spALBU_BOVIN|	4	0.7705	0	831.873	3324.47	3324.47	0.64	0.00053	1.53866	38058	5.36
DSSO_Eluate_Streptavidin	RHPYFYAPELLYYANK		spALBU_BOVIN|	3	1	0	682.348	2045.03	2045.03	1.39	0.00095	14.4035	38235	5.35
DSSO_Eluate_Streptavidin	HLVDEPQNLIKQNcDQFEK	C14(Carbamidomethyl)	spALBU_BOVIN|	3	1	0	785.72	2355.15	2355.14	2.84	0.00223	5.57523	27726	5.35
DSSO_Eluate_Streptavidin	LFTFHADIcTLPDTEK	C9(Carbamidomethyl)	spALBU_BOVIN|	3	0.9343	0	636.646	1907.92	1907.92	1.97	0.00125	28.4662	45487	5.33
DSSO_Eluate_Streptavidin	RHPEYAVSVLLR		spALBU_BOVIN|	3	1	0	480.609	1439.81	1439.81	-0.2	-0.0001	0	28754	5.32
DSSO_Eluate_Streptavidin	LFTFHADIcTLPDTEK	C9(Carbamidomethyl)	spALBU_BOVIN|	3	0.9849	0	636.645	1907.92	1907.92	-0.33	-0.00021	34.7492	46561	5.31
DSSO_Eluate_Streptavidin	ccTESLVNRRPcFSALTPDETYVPK	C1(Carbamidomethyl); C2(Carbamidomethyl); C12(Carbamidomethyl)	spALBU_BOVIN|	4	1	0	750.856	3000.4	3000.4	-0.07	-5e-05	29.9078	31811	5.29
DSSO_Eluate_Streptavidin	LFTFHADIcTLPDTEK	C9(Carbamidomethyl)	spALBU_BOVIN|	3	0.9036	0	636.646	1907.92	1907.92	0.63	0.0004	18.2917	34891	5.29
DSSO_Eluate_Streptavidin	RHPEYAVSVLLR		spALBU_BOVIN|	3	1	0	480.609	1439.81	1439.81	0.24	0.00012	7.01151	29689	5.25
DSSO_Eluate_Streptavidin	LFTFHADIcTLPDTEK	C9(Carbamidomethyl)	spALBU_BOVIN|	3	0.9349	0	636.645	1907.92	1907.92	0.15	9e-05	6.88427	40370	5.22
DSSO_Eluate_Streptavidin	AFDEKLFTFHADIcTLPDTEK	C14(Carbamidomethyl)	spALBU_BOVIN|	3	0.6956	0	833.402	2498.19	2498.19	-0.06	-5e-05	5.62994	38106	5.19
DSSO_Eluate_Streptavidin	RHPEYAVSVLLR		spALBU_BOVIN|	3	1	0	480.608	1439.81	1439.81	-1.16	-0.00056	33.0626	29223	5.17
DSSO_Eluate_Streptavidin	IITHPNFNGNTLDNDIMLIK		spTRYP_PIG|	3	1	0	761.734	2283.19	2283.18	2.79	0.00213	38.7139	39025	5.15
DSSO_Eluate_Streptavidin	AFDEKLFTFHADIcTLPDTEK	C14(Carbamidomethyl)	spALBU_BOVIN|	3	0.8699	0	833.404	2498.2	2498.19	2.87	0.00239	83.4968	39019	5.15
DSSO_Eluate_Streptavidin	RHPYFYAPELLYYANK		spALBU_BOVIN|	3	1	0	682.35	2045.04	2045.03	4.25	0.0029	24.8087	36067	5.12
DSSO_Eluate_Streptavidin	ccTKPESERMPcTEDYLSLILNR	C1(Carbamidomethyl); C2(Carbamidomethyl); C12(Carbamidomethyl)	spALBU_BOVIN|	4	0.9863	0	718.834	2872.31	2872.31	1.56	0.00112	0.216186	40704	5.1
DSSO_Eluate_Streptavidin	RHPYFYAPELLYYANK		spALBU_BOVIN|	3	1	0	682.349	2045.03	2045.03	1.66	0.00113	0	42601	5.09
DSSO_Eluate_Streptavidin	TVMENFVAFVDKccAADDKEAcFAVEGPK	C13(Carbamidomethyl); C14(Carbamidomethyl); C22(Carbamidomethyl)	spALBU_BOVIN|	4	0.815	0	827.875	3308.48	3308.47	1.69	0.0014	66.3694	41727	5.08
DSSO_Eluate_Streptavidin	RHPEYAVSVLLR		spALBU_BOVIN|	3	1	0	480.609	1439.81	1439.81	0.18	9e-05	7.23686	30611	5.07
DSSO_Eluate_Streptavidin	AFDEKLFTFHADIcTLPDTEK	C14(Carbamidomethyl)	spALBU_BOVIN|	3	0.8257	0	833.399	2498.18	2498.19	-2.99	-0.00249	72.0325	37573	5.05
DSSO_Eluate_Streptavidin	LFTFHADIcTLPDTEKQIK	C9(Carbamidomethyl)	spALBU_BOVIN|	3	0.9463	0	759.724	2277.16	2277.16	0.15	0.00012	34.4339	34179	5.03
DSSO_Eluate_Streptavidin	RHPEYAVSVLLR		spALBU_BOVIN|	3	1	0	480.609	1439.81	1439.81	1.32	0.00064	0.0703976	28281	5.03
DSSO_Eluate_Streptavidin	LKHLVDEPQNLIKQNcDQFEK	C16(Carbamidomethyl)	spALBU_BOVIN|	4	0.8623	0	649.836	2596.32	2596.32	0.54	0.00035	22.0565	26409	5.01
DSSO_Eluate_Streptavidin	SHcIAEVEKDAIPENLPPLTADFAEDKDVcK	C3(Carbamidomethyl); C30(Carbamidomethyl)	spALBU_BOVIN|	5	1	0	703.141	3511.68	3511.67	0.93	0.00066	22.8182	34993	5.01
DSSO_Eluate_Streptavidin	kNLIGALLFDSGETAEATR	K1(DSSO:H2O)	Cas9	3	1	0	728.029	2182.07	2182.07	1.87	0.00136	18.6388	49969	5.01
DSSO_Eluate_Streptavidin	HLVDEPQNLIKQNcDQFEK	C14(Carbamidomethyl)	spALBU_BOVIN|	4	0.934	0	589.54	2355.14	2355.14	-0.09	-6e-05	20.1393	27731	5
DSSO_Eluate_Streptavidin	RHPYFYAPELLYYANK		spALBU_BOVIN|	3	0.9499	0	682.347	2045.03	2045.03	-1.39	-0.00095	58.395	43051	4.99
DSSO_Eluate_Streptavidin	LAKEYEATLEEccAKDDPHAcYSTVFDK	C12(Carbamidomethyl); C13(Carbamidomethyl); C21(Carbamidomethyl)	spALBU_BOVIN|	5	0.9558	0	670.899	3350.47	3350.47	0.34	0.00023	0	28988	4.98
DSSO_Eluate_Streptavidin	YDEHHQDLTLLkALVR	K12(DSSO:H2O)	Cas9	3	1	0	709.69	2127.05	2127.05	0.03	2e-05	25.8223	41356	4.96
DSSO_Eluate_Streptavidin	RHPYFYAPELLYYANK		spALBU_BOVIN|	3	0.9415	0	682.347	2045.03	2045.03	-0.22	-0.00015	67.0236	39666	4.96
DSSO_Eluate_Streptavidin	TVMENFVAFVDKccAADDKEAcFAVEGPK	C13(Carbamidomethyl); C14(Carbamidomethyl); C22(Carbamidomethyl)	spALBU_BOVIN|	4	0.7854	0	827.874	3308.47	3308.47	0.44	0.00036	5.94659	44018	4.94
DSSO_Eluate_Streptavidin	RHPEYAVSVLLR		spALBU_BOVIN|	3	1	0	480.609	1439.81	1439.81	0.05	2e-05	37.9371	27880	4.94
DSSO_Eluate_Streptavidin	RHPYFYAPELLYYANK		spALBU_BOVIN|	3	0.9757	0	682.348	2045.03	2045.03	0.04	3e-05	0	40162	4.94
DSSO_Eluate_Streptavidin	RHPYFYAPELLYYANK		spALBU_BOVIN|	3	0.8923	0	682.348	2045.03	2045.03	0.58	0.0004	20.0911	37786	4.92
DSSO_Eluate_Streptavidin	LFTFHADIcTLPDTEK	C9(Carbamidomethyl)	spALBU_BOVIN|	3	0.9531	0	636.646	1907.92	1907.92	0.72	0.00046	28.9158	43210	4.9
DSSO_Eluate_Streptavidin	LGEYGFQNALIVR		spALBU_BOVIN|	3	0.8425	0	493.937	1479.8	1479.8	-0.29	-0.00014	0	38398	4.89
DSSO_Eluate_Streptavidin	DDPHAcYSTVFDKLK	C6(Carbamidomethyl)	spALBU_BOVIN|	3	1	0	599.283	1795.83	1795.83	0.91	0.00054	29.1109	30501	4.86
DSSO_Eluate_Streptavidin	AFDEKLFTFHADIcTLPDTEK	C14(Carbamidomethyl)	spALBU_BOVIN|	4	0.8663	0	625.304	2498.19	2498.19	1.67	0.00104	19.5279	37997	4.86
DSSO_Eluate_Streptavidin	GLVLIAFSQYLQQcPFDEHVK	C14(Carbamidomethyl)	spALBU_BOVIN|	3	1	0	831.427	2492.27	2492.26	0.81	0.00068	22.1332	49226	4.83
DSSO_Eluate_Streptavidin	LFTFHADIcTLPDTEK	C9(Carbamidomethyl)	spALBU_BOVIN|	3	1	0	636.645	1907.92	1907.92	-0.91	-0.00058	39.4784	52538	4.8
DSSO_Eluate_Streptavidin	EccHGDLLEcADDRADLAK	C2(Carbamidomethyl); C3(Carbamidomethyl); C10(Carbamidomethyl)	spALBU_BOVIN|	4	0.8021	0	562.741	2247.94	2247.94	-0.42	-0.00023	37.3631	25060	4.8
DSSO_Eluate_Streptavidin	LFTFHADIcTLPDTEK	C9(Carbamidomethyl)	spALBU_BOVIN|	3	0.8808	0	636.645	1907.92	1907.92	0.34	0.00022	38.3392	44599	4.78
DSSO_Eluate_Streptavidin	RHPYFYAPELLYYANK		spALBU_BOVIN|	3	0.9331	0	682.348	2045.03	2045.03	0.58	0.0004	0	47398	4.78
DSSO_Eluate_Streptavidin	YDEHHQDLTLLkALVR	K12(DSSO:H2O)	Cas9	3	1	0	709.69	2127.06	2127.05	1.24	0.00088	20.7207	42349	4.76
DSSO_Eluate_Streptavidin	LFTFHADIcTLPDTEK	C9(Carbamidomethyl)	spALBU_BOVIN|	3	1	0	636.644	1907.92	1907.92	-1.01	-0.00064	11.4437	47829	4.75
DSSO_Eluate_Streptavidin	LFTFHADIcTLPDTEK	C9(Carbamidomethyl)	spALBU_BOVIN|	3	0.9684	0	636.645	1907.92	1907.92	0.43	0.00028	64.882	54112	4.75
DSSO_Eluate_Streptavidin	AFDEKLFTFHADIcTLPDTEK	C14(Carbamidomethyl)	spALBU_BOVIN|	4	0.7865	0	625.303	2498.19	2498.19	0.01	0	0	38436	4.73
DSSO_Eluate_Streptavidin	LFTFHADIcTLPDTEKQIKK	C9(Carbamidomethyl)	spALBU_BOVIN|	4	0.8393	0	602.069	2405.26	2405.25	0.7	0.00042	2.87813	31646	4.73
DSSO_Eluate_Streptavidin	LKHLVDEPQNLIK		spALBU_BOVIN|	3	0.879	0	516.303	1546.89	1546.9	-1.21	-0.00062	0	24452	4.71
DSSO_Eluate_Streptavidin	RHPYFYAPELLYYANK		spALBU_BOVIN|	3	1	0	682.348	2045.03	2045.03	0.94	0.00064	29.9746	46089	4.71
DSSO_Eluate_Streptavidin	ccTESLVNRRPcFSALTPDETYVPK	C1(Carbamidomethyl); C2(Carbamidomethyl); C12(Carbamidomethyl)	spALBU_BOVIN|	4	1	0	750.856	3000.4	3000.4	0.58	0.00044	76.4856	31398	4.7
DSSO_Eluate_Streptavidin	kIEcFDSVEISGVEDR	K1(DSSO:H2O); C4(Carbamidomethyl)	Cas9	3	0.9509	0	686.971	2058.9	2058.9	0.24	0.00016	18.3083	34664	4.68
DSSO_Eluate_Streptavidin	RHPEYAVSVLLR		spALBU_BOVIN|	3	1	0	480.608	1439.81	1439.81	-1.22	-0.00059	57.3941	31053	4.68
DSSO_Eluate_Streptavidin	EYEATLEEccAKDDPHAcYSTVFDKLK	C9(Carbamidomethyl); C10(Carbamidomethyl); C18(Carbamidomethyl)	spALBU_BOVIN|	4	1	0	820.612	3279.43	3279.43	0	0	86.9657	31391	4.68
DSSO_Eluate_Streptavidin	RHPEYAVSVLLR		spALBU_BOVIN|	3	1	0	480.609	1439.81	1439.81	0.05	2e-05	24.2014	30200	4.63
DSSO_Eluate_Streptavidin	LFTFHADIcTLPDTEK	C9(Carbamidomethyl)	spALBU_BOVIN|	3	0.9328	0	636.645	1907.92	1907.92	0.43	0.00028	38.7457	43690	4.61
DSSO_Eluate_Streptavidin	RHPEYAVSVLLR		spALBU_BOVIN|	3	1	0	480.609	1439.81	1439.81	0.18	9e-05	31.185	32561	4.6
DSSO_Eluate_Streptavidin	ccTKPESERmPcTEDYLSLILNR	C1(Carbamidomethyl); C2(Carbamidomethyl); M10(Oxidation); C12(Carbamidomethyl)	spALBU_BOVIN|	4	0.9804	0	722.833	2888.31	2888.3	1.37	0.00099	15.8305	39809	4.6
DSSO_Eluate_Streptavidin	RHPYFYAPELLYYANK		spALBU_BOVIN|	3	1	0	682.349	2045.03	2045.03	2.28	0.00156	55.1418	53848	4.59
DSSO_Eluate_Streptavidin	RHPYFYAPELLYYANK		spALBU_BOVIN|	3	0.9434	0	682.35	2045.04	2045.03	4.25	0.0029	29.3919	38718	4.59
DSSO_Eluate_Streptavidin	RHPYFYAPELLYYANK		spALBU_BOVIN|	3	0.9716	0	682.348	2045.03	2045.03	0.67	0.00046	14.8536	44581	4.57
DSSO_Eluate_Streptavidin	LFTFHADIcTLPDTEK	C9(Carbamidomethyl)	spALBU_BOVIN|	3	0.9408	0	636.646	1907.92	1907.92	0.72	0.00046	22.8189	47408	4.56
DSSO_Eluate_Streptavidin	ccTKPESERmPcTEDYLSLILNR	C1(Carbamidomethyl); C2(Carbamidomethyl); M10(Oxidation); C12(Carbamidomethyl)	spALBU_BOVIN|	4	1	0	722.832	2888.31	2888.3	1.11	0.0008	61.2746	39264	4.56
DSSO_Eluate_Streptavidin	RHPYFYAPELLYYANK		spALBU_BOVIN|	3	0.9342	0	682.347	2045.03	2045.03	-0.67	-0.00046	14.9499	39198	4.56
DSSO_Eluate_Streptavidin	RHPYFYAPELLYYANK		spALBU_BOVIN|	3	0.978	0	682.349	2045.03	2045.03	2.28	0.00156	17.3631	35600	4.55
DSSO_Eluate_Streptavidin	ccTKPESERMPcTEDYLSLILNR	C1(Carbamidomethyl); C2(Carbamidomethyl); C12(Carbamidomethyl)	spALBU_BOVIN|	4	1	0	718.833	2872.31	2872.31	0.62	0.00045	41.8886	39704	4.54
DSSO_Eluate_Streptavidin	RHPYFYAPELLYYANK		spALBU_BOVIN|	3	0.9403	0	682.348	2045.03	2045.03	0.49	0.00034	25.235	40626	4.52
DSSO_Eluate_Streptavidin	EYEATLEEccAKDDPHAcYSTVFDKLK	C9(Carbamidomethyl); C10(Carbamidomethyl); C18(Carbamidomethyl)	spALBU_BOVIN|	5	1	0	656.692	3279.43	3279.43	0.94	0.00062	15.1177	31410	4.51
DSSO_Eluate_Streptavidin	LFTFHADIcTLPDTEK	C9(Carbamidomethyl)	spALBU_BOVIN|	3	0.9246	0	636.645	1907.92	1907.92	0.15	9e-05	48.4514	46039	4.51
DSSO_Eluate_Streptavidin	RHPYFYAPELLYYANK		spALBU_BOVIN|	3	0.9556	0	682.349	2045.03	2045.03	1.66	0.00113	13.4509	44086	4.5
DSSO_Eluate_Streptavidin	ccTKPESERMPcTEDYLSLILNR	C1(Carbamidomethyl); C2(Carbamidomethyl); C12(Carbamidomethyl)	spALBU_BOVIN|	4	1	0	718.833	2872.31	2872.31	0.2	0.00014	9.74775	41261	4.5
DSSO_Eluate_Streptavidin	RHPEYAVSVLLR		spALBU_BOVIN|	3	1	0	480.609	1439.81	1439.81	0.5	0.00024	23.7668	31503	4.5
DSSO_Eluate_Streptavidin	AFDEKLFTFHADIcTLPDTEK	C14(Carbamidomethyl)	spALBU_BOVIN|	3	0.7338	0	833.402	2498.19	2498.19	0.01	1e-05	25.0222	39562	4.47
DSSO_Eluate_Streptavidin	mPcTEDYLSLILNR	M1(Oxidation); C3(Carbamidomethyl)	spALBU_BOVIN|	3	0.8543	0	580.948	1740.83	1740.83	0.17	0.0001	74.6685	47889	4.46
DSSO_Eluate_Streptavidin	LFTFHADIcTLPDTEK	C9(Carbamidomethyl)	spALBU_BOVIN|	3	0.9574	0	636.646	1907.92	1907.92	1.87	0.00119	35.0924	47006	4.46
DSSO_Eluate_Streptavidin	MPcTEDYLSLILNR	C3(Carbamidomethyl)	spALBU_BOVIN|	3	0.8857	0	575.616	1724.83	1724.83	-0.2	-0.00011	10.6352	48450	4.46
DSSO_Eluate_Streptavidin	RHPYFYAPELLYYANK		spALBU_BOVIN|	3	0.9709	0	682.348	2045.03	2045.03	0.31	0.00021	19.1016	45455	4.46
DSSO_Eluate_Streptavidin	RHPYFYAPELLYYANK		spALBU_BOVIN|	3	1	0	682.348	2045.03	2045.03	1.12	0.00076	52.2903	42112	4.44
DSSO_Eluate_Streptavidin	LFTFHADIcTLPDTEK	C9(Carbamidomethyl)	spALBU_BOVIN|	3	0.8756	0	636.645	1907.92	1907.92	0.43	0.00028	6.65607	49498	4.42
DSSO_Eluate_Streptavidin	MPcTEDYLSLILNR	C3(Carbamidomethyl)	spALBU_BOVIN|	3	0.9502	0	575.617	1724.84	1724.83	0.86	0.0005	0.28556	48776	4.42
DSSO_Eluate_Streptavidin	AEFVEVTKLVTDLTK		spALBU_BOVIN|	3	0.7596	0	564.986	1692.94	1692.94	0.46	0.00026	23.0167	45121	4.41
DSSO_Eluate_Streptavidin	LFTFHADIcTLPDTEK	C9(Carbamidomethyl)	spALBU_BOVIN|	3	0.9795	0	636.646	1907.92	1907.92	2.07	0.00131	0	49111	4.4
DSSO_Eluate_Streptavidin	RHPEYAVSVLLR		spALBU_BOVIN|	3	1	0	480.609	1439.81	1439.81	0.37	0.00018	73.7667	32149	4.39
DSSO_Eluate_Streptavidin	LKPDPNTLcDEFKADEK	C9(Carbamidomethyl)	spALBU_BOVIN|	4	0.8998	0	505.749	2019.97	2019.97	2.27	0.00115	21.8046	27725	4.39
DSSO_Eluate_Streptavidin	ATEEQLKTVMENFVAFVDK		spALBU_BOVIN|	3	0.9863	0	733.705	2199.1	2199.1	0.14	0.0001	25.3244	48908	4.37
DSSO_Eluate_Streptavidin	MPcTEDYLSLILNR	C3(Carbamidomethyl)	spALBU_BOVIN|	3	0.9402	0	575.617	1724.84	1724.83	0.33	0.00019	35.3282	47655	4.35
DSSO_Eluate_Streptavidin	DAIPENLPPLTADFAEDKDVcKNYQEAK	C21(Carbamidomethyl)	spALBU_BOVIN|	4	0.8986	0	798.637	3191.53	3191.52	1.69	0.00135	16.6162	36204	4.34
DSSO_Eluate_Streptavidin	kSEETITPWNFEEVVDK	K1(DSSO:H2O)	Cas9	3	0.6975	0	743.01	2227.01	2227.01	1.3	0.00097	4.85084	44515	4.33
DSSO_Eluate_Streptavidin	LFTFHADIcTLPDTEK	C9(Carbamidomethyl)	spALBU_BOVIN|	3	0.9443	0	636.646	1907.92	1907.92	0.63	0.0004	22.4722	54492	4.31
DSSO_Eluate_Streptavidin	LFTFHADIcTLPDTEK	C9(Carbamidomethyl)	spALBU_BOVIN|	3	0.9768	0	636.645	1907.92	1907.92	-0.43	-0.00027	55.2185	53020	4.31
DSSO_Eluate_Streptavidin	LFTFHADIcTLPDTEK	C9(Carbamidomethyl)	spALBU_BOVIN|	3	0.8933	0	636.645	1907.92	1907.92	0.53	0.00034	26.0209	49861	4.31
DSSO_Eluate_Streptavidin	AFDEKLFTFHADIcTLPDTEK	C14(Carbamidomethyl)	spALBU_BOVIN|	3	0.8023	0	833.406	2498.2	2498.19	5.29	0.0044	14.1669	41027	4.3
DSSO_Eluate_Streptavidin	LFTFHADIcTLPDTEKQIK	C9(Carbamidomethyl)	spALBU_BOVIN|	4	0.8042	0	570.046	2277.16	2277.16	1.49	0.00085	14.8588	34100	4.29
DSSO_Eluate_Streptavidin	SVkELLGITImER	K3(DSSO:H2O); M11(Oxidation)	Cas9	3	1	0	560.956	1680.85	1680.85	-0.19	-0.00011	8.04011	42813	4.29
DSSO_Eluate_Streptavidin	LFTFHADIcTLPDTEK	C9(Carbamidomethyl)	spALBU_BOVIN|	3	0.9836	0	636.645	1907.92	1907.92	0.15	9e-05	33.3151	48748	4.28
DSSO_Eluate_Streptavidin	LFTFHADIcTLPDTEK	C9(Carbamidomethyl)	spALBU_BOVIN|	3	0.9251	0	636.645	1907.92	1907.92	0.05	3e-05	14.5938	45042	4.27
DSSO_Eluate_Streptavidin	RHPYFYAPELLYYANK		spALBU_BOVIN|	3	1	0	682.35	2045.03	2045.03	3.09	0.00211	38.6291	54252	4.24
DSSO_Eluate_Streptavidin	MPcTEDYLSLILNR	C3(Carbamidomethyl)	spALBU_BOVIN|	3	0.8726	0	575.617	1724.84	1724.83	0.33	0.00019	3.07794	49543	4.24
DSSO_Eluate_Streptavidin	RHPYFYAPELLYYANK		spALBU_BOVIN|	3	1	0	682.349	2045.03	2045.03	2.91	0.00198	0	47806	4.23
DSSO_Eluate_Streptavidin	RHPYFYAPELLYYANK		spALBU_BOVIN|	3	1	0	682.348	2045.03	2045.03	0.94	0.00064	0	48220	4.2
DSSO_Eluate_Streptavidin	RPcFSALTPDETYVPK	C3(Carbamidomethyl)	spALBU_BOVIN|	3	1	0	627.646	1880.92	1880.92	0.46	0.00029	1.22702	30540	4.19
DSSO_Eluate_Streptavidin	SHcIAEVEKDAIPENLPPLTADFAEDKDVcK	C3(Carbamidomethyl); C30(Carbamidomethyl)	spALBU_BOVIN|	5	1	0	703.141	3511.68	3511.67	1.63	0.00114	17.9942	35700	4.18
DSSO_Eluate_Streptavidin	RHPYFYAPELLYYANK		spALBU_BOVIN|	3	1	0	682.35	2045.03	2045.03	3	0.00204	43.4382	48949	4.17
DSSO_Eluate_Streptavidin	RHPYFYAPELLYYANK		spALBU_BOVIN|	3	0.9281	0	682.348	2045.03	2045.03	0.22	0.00015	32.9763	45015	4.17
DSSO_Eluate_Streptavidin	MPcTEDYLSLILNR	C3(Carbamidomethyl)	spALBU_BOVIN|	3	0.9496	0	575.617	1724.84	1724.83	0.55	0.00031	11.6405	48069	4.17
DSSO_Eluate_Streptavidin	LFTFHADIcTLPDTEK	C9(Carbamidomethyl)	spALBU_BOVIN|	3	0.9281	0	636.646	1907.92	1907.92	1.68	0.00107	27.5595	50415	4.17
DSSO_Eluate_Streptavidin	AFDEKLFTFHADIcTLPDTEK	C14(Carbamidomethyl)	spALBU_BOVIN|	3	0.8729	0	833.404	2498.2	2498.19	2.21	0.00184	21.2811	40520	4.17
DSSO_Eluate_Streptavidin	LKPDPNTLcDEFKADEKK	C9(Carbamidomethyl)	spALBU_BOVIN|	4	0.7783	0	537.771	2148.06	2148.06	-0.36	-0.00019	13.517	25460	4.15
DSSO_Eluate_Streptavidin	RHPYFYAPELLYYANK		spALBU_BOVIN|	4	0.8478	0	512.012	2045.03	2045.03	0.01	0	21.7372	36288	4.14
DSSO_Eluate_Streptavidin	RHPYFYAPELLYYANK		spALBU_BOVIN|	3	0.9831	0	682.346	2045.02	2045.03	-2.46	-0.00168	42.3836	46988	4.13
DSSO_Eluate_Streptavidin	LFTFHADIcTLPDTEKQIKK	C9(Carbamidomethyl)	spALBU_BOVIN|	3	1	0	802.425	2405.26	2405.25	2.71	0.00217	0	31657	4.11
DSSO_Eluate_Streptavidin	RHPYFYAPELLYYANK		spALBU_BOVIN|	3	1	0	682.349	2045.03	2045.03	2.64	0.0018	8.00367	49319	4.1
DSSO_Eluate_Streptavidin	RHPYFYAPELLYYANK		spALBU_BOVIN|	3	1	0	682.349	2045.03	2045.03	2.19	0.0015	16.0339	53482	4.1
DSSO_Eluate_Streptavidin	RHPYFYAPELLYYANK		spALBU_BOVIN|	3	0.9756	0	682.348	2045.03	2045.03	0.31	0.00021	15.8511	46525	4.09
DSSO_Eluate_Streptavidin	RHPYFYAPELLYYANK		spALBU_BOVIN|	3	0.9877	0	682.349	2045.03	2045.03	1.92	0.00131	47.0635	51743	4.08
DSSO_Eluate_Streptavidin	DAFLGSFLYEYSR		spALBU_BOVIN|	3	0.8621	0	523.253	1567.74	1567.74	0.61	0.00032	23.668	48955	4.06
DSSO_Eluate_Streptavidin	RHPEYAVSVLLR		spALBU_BOVIN|	3	1	0	480.608	1439.81	1439.81	-0.84	-0.0004	24.6623	32934	4.04
DSSO_Eluate_Streptavidin	RHPYFYAPELLYYANK		spALBU_BOVIN|	4	0.8015	0	512.012	2045.03	2045.03	-0.35	-0.00018	14.996	37261	4.03
DSSO_Eluate_Streptavidin	SLHTLFGDELcK	C11(Carbamidomethyl)	spALBU_BOVIN|	3	0.9727	0	473.903	1419.69	1419.69	-0.01	0	30.3783	32233	4.03
DSSO_Eluate_Streptavidin	LFTFHADIcTLPDTEK	C9(Carbamidomethyl)	spALBU_BOVIN|	3	0.9002	0	636.646	1907.92	1907.92	0.63	0.0004	11.8246	50757	4.01
DSSO_Eluate_Streptavidin	AFDEKLFTFHADIcTLPDTEKQIK	C14(Carbamidomethyl)	spALBU_BOVIN|	5	0.8653	0	574.292	2867.43	2867.43	1.28	0.00073	8.18584	36581	4.01
DSSO_Eluate_Streptavidin	LFTFHADIcTLPDTEKQIKK	C9(Carbamidomethyl)	spALBU_BOVIN|	5	0.8978	0	481.856	2405.25	2405.25	-0.41	-0.0002	3.13961	31637	4.01
DSSO_Eluate_Streptavidin	RHPYFYAPELLYYANK		spALBU_BOVIN|	3	1	0	682.349	2045.03	2045.03	1.57	0.00107	0	48614	4
DSSO_Eluate_Streptavidin	LFTFHADIcTLPDTEK	C9(Carbamidomethyl)	spALBU_BOVIN|	3	1	0	636.644	1907.92	1907.92	-1.1	-0.0007	38.7521	52183	3.97
DSSO_Eluate_Streptavidin	TVMENFVAFVDKccAADDKEAcFAVEGPK	C13(Carbamidomethyl); C14(Carbamidomethyl); C22(Carbamidomethyl)	spALBU_BOVIN|	4	0.6886	0	827.875	3308.48	3308.47	1.54	0.00128	9.52455	38396	3.95
DSSO_Eluate_Streptavidin	RHPEYAVSVLLR		spALBU_BOVIN|	3	1	0	480.609	1439.81	1439.81	0.18	9e-05	15.4105	53983	3.93
DSSO_Eluate_Streptavidin	HLVDEPQNLIK		spALBU_BOVIN|	3	0.7735	0	435.91	1305.72	1305.72	0.05	2e-05	19.3785	25780	3.93
DSSO_Eluate_Streptavidin	HPYFYAPELLYYANK		spALBU_BOVIN|	3	1	0	630.315	1888.93	1888.93	2.2	0.00139	10.2907	41227	3.92
DSSO_Eluate_Streptavidin	MPcTEDYLSLILNR	C3(Carbamidomethyl)	spALBU_BOVIN|	3	1	0	575.617	1724.84	1724.83	0.23	0.00013	41.0143	49148	3.92
DSSO_Eluate_Streptavidin	QNcDQFEKLGEYGFQNALIVR	C3(Carbamidomethyl)	spALBU_BOVIN|	3	0.9056	0	843.737	2529.2	2529.22	-8.95	-0.00755	63.2492	46592	3.92
DSSO_Eluate_Streptavidin	mPcTEDYLSLILNR	M1(Oxidation); C3(Carbamidomethyl)	spALBU_BOVIN|	3	0.8772	0	580.948	1740.83	1740.83	0.38	0.00022	7.91365	47082	3.91
DSSO_Eluate_Streptavidin	MLASAGELQkGNELALPSK	K10(DSSO:H2O)	Cas9	3	0.4359	0	711.691	2133.06	2133.06	0.66	0.00047	12.4725	34166	3.9
DSSO_Eluate_Streptavidin	TVMENFVAFVDKccAADDKEAcFAVEGPK	C13(Carbamidomethyl); C14(Carbamidomethyl); C22(Carbamidomethyl)	spALBU_BOVIN|	4	0.732	0	827.874	3308.47	3308.47	0.21	0.00018	33.3361	42202	3.88
DSSO_Eluate_Streptavidin	RHPYFYAPELLYYANK		spALBU_BOVIN|	3	0.9974	0	682.349	2045.03	2045.03	1.75	0.00119	24.2331	54625	3.88
DSSO_Eluate_Streptavidin	ccTKPESERmPcTEDYLSLILNR	C1(Carbamidomethyl); C2(Carbamidomethyl); M10(Oxidation); C12(Carbamidomethyl)	spALBU_BOVIN|	4	1	0	722.832	2888.31	2888.3	0.69	0.0005	9.38755	40509	3.87
DSSO_Eluate_Streptavidin	LKPDPNTLcDEFKADEK	C9(Carbamidomethyl)	spALBU_BOVIN|	4	0.8756	0	505.746	2019.96	2019.97	-2.74	-0.00138	0	27257	3.86
DSSO_Eluate_Streptavidin	RHPYFYAPELLYYANK		spALBU_BOVIN|	3	1	0	682.349	2045.03	2045.03	2.73	0.00186	73.2683	53125	3.86
DSSO_Eluate_Streptavidin	HPEYAVSVLLR		spALBU_BOVIN|	3	1	0	428.575	1283.71	1283.71	-0.56	-0.00024	15.3539	32143	3.85
DSSO_Eluate_Streptavidin	RHPEYAVSVLLR		spALBU_BOVIN|	3	1	0	480.609	1439.81	1439.81	0.24	0.00012	66.7836	53603	3.85
DSSO_Eluate_Streptavidin	SSFEkNPIDFLEAK	K5(DSSO:H2O)	Cas9	3	0.8312	0	600.95	1800.84	1800.84	0.4	0.00024	6.19764	43470	3.85
DSSO_Eluate_Streptavidin	AFDEKLFTFHADIcTLPDTEK	C14(Carbamidomethyl)	spALBU_BOVIN|	4	0.8851	0	625.304	2498.19	2498.19	1.28	0.0008	0	39883	3.83
DSSO_Eluate_Streptavidin	mLASAGELQkGNELALPSK	M1(Oxidation); K10(DSSO:H2O)	Cas9	3	0.4974	0	717.023	2149.05	2149.05	0.86	0.00062	81.66	32489	3.82
DSSO_Eluate_Streptavidin	TILDFLkSDGFANR	K7(DSSO:H2O)	Cas9	3	1	0	591.623	1772.85	1772.85	0.64	0.00038	8.01101	47888	3.82
DSSO_Eluate_Streptavidin	LFTFHADIcTLPDTEK	C9(Carbamidomethyl)	spALBU_BOVIN|	3	1	0	636.645	1907.92	1907.92	-0.72	-0.00046	22.4032	51400	3.81
DSSO_Eluate_Streptavidin	TVMENFVAFVDKccAADDKEAcFAVEGPK	C13(Carbamidomethyl); C14(Carbamidomethyl); C22(Carbamidomethyl)	spALBU_BOVIN|	3	0.9395	0	1103.5	3308.5	3308.47	6.84	0.00754	17.6519	43111	3.8
DSSO_Eluate_Streptavidin	LFTFHADIcTLPDTEK	C9(Carbamidomethyl)	spALBU_BOVIN|	3	0.8789	0	636.646	1907.92	1907.92	1.01	0.00064	19.1305	53385	3.8
DSSO_Eluate_Streptavidin	SVkELLGITIMER	K3(DSSO:H2O)	Cas9	3	0.8232	0	555.625	1664.86	1664.86	0.74	0.00041	9.4278	46776	3.79
DSSO_Eluate_Streptavidin	SLHTLFGDELcKVASLR	C11(Carbamidomethyl)	spALBU_BOVIN|	4	0.8865	0	487.26	1946.02	1946.02	0.67	0.00033	74.8105	40096	3.79
DSSO_Eluate_Streptavidin	SHcIAEVEKDAIPENLPPLTADFAEDKDVcK	C3(Carbamidomethyl); C30(Carbamidomethyl)	spALBU_BOVIN|	5	1	0	703.141	3511.68	3511.67	1.02	0.00072	0	36281	3.78
DSSO_Eluate_Streptavidin	VHKEccHGDLLEcADDRADLAK	C5(Carbamidomethyl); C6(Carbamidomethyl); C13(Carbamidomethyl)	spALBU_BOVIN|	4	0.8541	0	653.797	2612.17	2612.17	1.09	0.00071	2.05938	21326	3.77
DSSO_Eluate_Streptavidin	MPcTEDYLSLILNR	C3(Carbamidomethyl)	spALBU_BOVIN|	3	0.9284	0	575.617	1724.84	1724.83	0.55	0.00031	39.7788	50472	3.77
DSSO_Eluate_Streptavidin	mPcTEDYLSLILNR	M1(Oxidation); C3(Carbamidomethyl)	spALBU_BOVIN|	3	0.8824	0	580.948	1740.83	1740.83	0.38	0.00022	23.4839	46287	3.74
DSSO_Eluate_Streptavidin	KQTALVELLK		spALBU_BOVIN|	3	1	0	381.577	1142.72	1142.71	0.63	0.00024	66.0504	30579	3.74
DSSO_Eluate_Streptavidin	mPcTEDYLSLILNR	M1(Oxidation); C3(Carbamidomethyl)	spALBU_BOVIN|	3	0.9677	0	580.948	1740.83	1740.83	-0.15	-9e-05	5.85161	48287	3.72
DSSO_Eluate_Streptavidin	HkPENIVIEMAR	K2(DSSO:H2O)	Cas9	3	0.9191	0	538.266	1612.78	1612.78	0.09	5e-05	0	30406	3.71
DSSO_Eluate_Streptavidin	ccAADDKEAcFAVEGPK	C1(Carbamidomethyl); C2(Carbamidomethyl); C10(Carbamidomethyl)	spALBU_BOVIN|	3	1	0	643.274	1927.81	1927.8	5.3	0.0034	52.4527	22653	3.71
DSSO_Eluate_Streptavidin	RHPYFYAPELLYYANK		spALBU_BOVIN|	3	1	0	682.349	2045.03	2045.03	1.75	0.00119	22.1747	50046	3.7
DSSO_Eluate_Streptavidin	FKDLGEEHFK		spALBU_BOVIN|	3	0.9837	0	417.212	1249.62	1249.62	0.46	0.00019	32.2727	20299	3.69
DSSO_Eluate_Streptavidin	LFTFHADIcTLPDTEK	C9(Carbamidomethyl)	spALBU_BOVIN|	3	0.8238	0	636.646	1907.92	1907.92	1.39	0.00089	33.491	51841	3.69
DSSO_Eluate_Streptavidin	AFDEKLFTFHADIcTLPDTEK	C14(Carbamidomethyl)	spALBU_BOVIN|	4	0.8157	0	625.304	2498.2	2498.19	1.86	0.00116	0	37510	3.69
DSSO_Eluate_Streptavidin	ccTKPESERMPcTEDYLSLILNR	C1(Carbamidomethyl); C2(Carbamidomethyl); C12(Carbamidomethyl)	spALBU_BOVIN|	4	1	0	718.826	2872.28	2872.31	-9.41	-0.00675	21.8896	44172	3.67
DSSO_Eluate_Streptavidin	LFTFHADIcTLPDTEK	C9(Carbamidomethyl)	spALBU_BOVIN|	3	0.8256	0	636.646	1907.92	1907.92	0.91	0.00058	79.7099	44259	3.67
DSSO_Eluate_Streptavidin	VNTEITkAPLSASMIK	K7(DSSO:H2O)	Cas9	3	0.6393	0	626.99	1878.96	1878.96	0.45	0.00028	70.3768	34644	3.66
DSSO_Eluate_Streptavidin	VHKEccHGDLLEcADDRADLAK	C5(Carbamidomethyl); C6(Carbamidomethyl); C13(Carbamidomethyl)	spALBU_BOVIN|	5	0.663	0	523.239	2612.17	2612.17	0.48	0.00025	26.2547	21314	3.65
DSSO_Eluate_Streptavidin	MPcTEDYLSLILNR	C3(Carbamidomethyl)	spALBU_BOVIN|	3	0.8795	0	575.617	1724.84	1724.83	1.71	0.00099	40.1168	50889	3.65
DSSO_Eluate_Streptavidin	RHPYFYAPELLYYANK		spALBU_BOVIN|	3	1	0	682.35	2045.03	2045.03	3.18	0.00217	0	50748	3.65
DSSO_Eluate_Streptavidin	RHPEYAVSVLLR		spALBU_BOVIN|	3	1	0	480.609	1439.81	1439.81	-0.01	-1e-05	0	47492	3.64
DSSO_Eluate_Streptavidin	RHPEYAVSVLLR		spALBU_BOVIN|	3	1	0	480.609	1439.81	1439.81	0.05	2e-05	44.4926	44990	3.63
DSSO_Eluate_Streptavidin	RHPYFYAPELLYYANK		spALBU_BOVIN|	3	1	0	682.349	2045.03	2045.03	1.66	0.00113	0	51058	3.61
DSSO_Eluate_Streptavidin	RHPEYAVSVLLR		spALBU_BOVIN|	3	1	0	480.609	1439.81	1439.81	1.07	0.00051	41.1293	45907	3.61
DSSO_Eluate_Streptavidin	AFDEKLFTFHADIcTLPDTEK	C14(Carbamidomethyl)	spALBU_BOVIN|	4	0.7978	0	625.304	2498.19	2498.19	0.59	0.00037	22.9642	38934	3.61
DSSO_Eluate_Streptavidin	LFTFHADIcTLPDTEKQIK	C9(Carbamidomethyl)	spALBU_BOVIN|	4	0.9194	0	570.045	2277.16	2277.16	0.09	5e-05	0	34504	3.6
DSSO_Eluate_Streptavidin	HPYFYAPELLYYANK		spALBU_BOVIN|	3	1	0	630.315	1888.93	1888.93	1.62	0.00102	34.9492	42403	3.6
DSSO_Eluate_Streptavidin	RHPEYAVSVLLR		spALBU_BOVIN|	3	1	0	480.608	1439.81	1439.81	-0.65	-0.00031	0	48939	3.6
DSSO_Eluate_Streptavidin	MPcTEDYLSLILNR	C3(Carbamidomethyl)	spALBU_BOVIN|	3	0.9358	0	575.617	1724.84	1724.83	0.97	0.00056	6.85957	49894	3.58
DSSO_Eluate_Streptavidin	LFTFHADIcTLPDTEK	C9(Carbamidomethyl)	spALBU_BOVIN|	3	0.9078	0	636.646	1907.92	1907.92	0.72	0.00046	11.5966	51068	3.58
DSSO_Eluate_Streptavidin	LESEFVYGDYkVYDVR	K11(DSSO:H2O)	Cas9	3	1	0	719.995	2157.97	2157.97	1.48	0.00107	17.2613	38850	3.57
DSSO_Eluate_Streptavidin	RPcFSALTPDETYVPK	C3(Carbamidomethyl)	spALBU_BOVIN|	3	1	0	627.646	1880.92	1880.92	1.92	0.0012	39.0694	30132	3.57
DSSO_Eluate_Streptavidin	RHPEYAVSVLLR		spALBU_BOVIN|	3	1	0	480.608	1439.81	1439.81	-1.28	-0.00062	0	54736	3.55
DSSO_Eluate_Streptavidin	RHPEYAVSVLLR		spALBU_BOVIN|	3	1	0	480.609	1439.81	1439.81	-0.39	-0.00019	82.4985	52883	3.54
DSSO_Eluate_Streptavidin	mPcTEDYLSLILNR	M1(Oxidation); C3(Carbamidomethyl)	spALBU_BOVIN|	3	0.8612	0	580.948	1740.83	1740.83	-0.36	-0.00021	31.9652	46722	3.53
DSSO_Eluate_Streptavidin	RHPYFYAPELLYYANK		spALBU_BOVIN|	3	1	0	682.349	2045.03	2045.03	1.48	0.00101	0	51392	3.52
DSSO_Eluate_Streptavidin	LKEccDKPLLEK	C4(Carbamidomethyl); C5(Carbamidomethyl)	spALBU_BOVIN|	4	0.8693	0	383.951	1532.78	1532.78	0.26	0.0001	0	17998	3.52
DSSO_Eluate_Streptavidin	RHPYFYAPELLYYANK		spALBU_BOVIN|	3	1	0	682.35	2045.04	2045.03	3.72	0.00253	0	50358	3.52
DSSO_Eluate_Streptavidin	RHPYFYAPELLYYANK		spALBU_BOVIN|	3	0.7208	0	682.347	2045.03	2045.03	-0.67	-0.00046	90.1613	41106	3.51
DSSO_Eluate_Streptavidin	LFTFHADIcTLPDTEKQIK	C9(Carbamidomethyl)	spALBU_BOVIN|	4	0.7464	0	570.045	2277.16	2277.16	0.63	0.00036	5.95278	34264	3.51
DSSO_Eluate_Streptavidin	LFTFHADIcTLPDTEK	C9(Carbamidomethyl)	spALBU_BOVIN|	3	0.9257	0	636.645	1907.92	1907.92	0.24	0.00015	75.8218	48281	3.5
DSSO_Eluate_Streptavidin	LKEccDKPLLEK	C4(Carbamidomethyl); C5(Carbamidomethyl)	spALBU_BOVIN|	3	0.9143	0	511.599	1532.78	1532.78	0.57	0.00029	40.3761	17999	3.5
DSSO_Eluate_Streptavidin	LPkYSLFELENGR	K3(DSSO:H2O)	Cas9	3	1	0	581.286	1741.84	1741.85	-1.45	-0.00084	25.2769	41088	3.49
DSSO_Eluate_Streptavidin	QEPERNEcFLSHKDDSPDLPK	C8(Carbamidomethyl)	spALBU_BOVIN|	5	0.9713	0	509.039	2541.16	2541.17	-1.03	-0.00052	22.2957	21952	3.49
DSSO_Eluate_Streptavidin	kNLIGALLFDSGETAEATR	K1(DSSO:H2O)	Cas9	3	0.8876	0	728.029	2182.07	2182.07	1.28	0.00093	23.3294	47678	3.47
DSSO_Eluate_Streptavidin	LFTFHADIcTLPDTEK	C9(Carbamidomethyl)	spALBU_BOVIN|	3	0.9078	0	636.646	1907.92	1907.92	1.11	0.0007	18.54	54857	3.47
DSSO_Eluate_Streptavidin	ccTKPESERMPcTEDYLSLILNR	C1(Carbamidomethyl); C2(Carbamidomethyl); C12(Carbamidomethyl)	spALBU_BOVIN|	5	0.8435	0	575.27	2872.32	2872.31	4.17	0.00239	0	40718	3.45
DSSO_Eluate_Streptavidin	AFDEKLFTFHADIcTLPDTEK	C14(Carbamidomethyl)	spALBU_BOVIN|	3	0.8696	0	833.397	2498.18	2498.19	-5.71	-0.00475	57.8115	36847	3.45
DSSO_Eluate_Streptavidin	RHPYFYAPELLYYANK		spALBU_BOVIN|	3	1	0	682.35	2045.04	2045.03	4.25	0.0029	38.9436	52420	3.44
DSSO_Eluate_Streptavidin	RHPYFYAPELLYYANK		spALBU_BOVIN|	3	1	0	682.348	2045.03	2045.03	1.3	0.00088	10.3956	52063	3.43
DSSO_Eluate_Streptavidin	SHcIAEVEKDAIPENLPPLTADFAEDKDVcK	C3(Carbamidomethyl); C30(Carbamidomethyl)	spALBU_BOVIN|	4	0.9179	0	878.673	3511.67	3511.67	-0.54	-0.00047	29.9229	36402	3.41
DSSO_Eluate_Streptavidin	TILDFLkSDGFANR	K7(DSSO:H2O)	Cas9	3	1	0	591.623	1772.85	1772.85	0.84	0.0005	25.8438	49272	3.41
DSSO_Eluate_Streptavidin	TVMENFVAFVDK		spALBU_BOVIN|	3	0.827	0	467.236	1399.69	1399.69	0.58	0.00027	45.5522	44628	3.41
DSSO_Eluate_Streptavidin	RHPEYAVSVLLR		spALBU_BOVIN|	3	1	0	480.609	1439.81	1439.81	0.43	0.00021	38.1043	27346	3.41
DSSO_Eluate_Streptavidin	RHPYFYAPELLYYANK		spALBU_BOVIN|	3	0.9677	0	682.352	2045.04	2045.03	6.13	0.00418	49.39	52771	3.41
DSSO_Eluate_Streptavidin	KFWGKYLYEIAR		spALBU_BOVIN|	3	0.8794	0	525.289	1573.85	1573.85	-0.19	-0.0001	8.99777	33199	3.4
DSSO_Eluate_Streptavidin	RHPEYAVSVLLR		spALBU_BOVIN|	3	1	0	480.609	1439.81	1439.81	-0.46	-0.00022	41.8848	49452	3.4
DSSO_Eluate_Streptavidin	HkPENIVIEMAR	K2(DSSO:H2O)	Cas9	3	0.8794	0	538.266	1612.78	1612.78	0.32	0.00017	0	29999	3.4
DSSO_Eluate_Streptavidin	mPcTEDYLSLILNR	M1(Oxidation); C3(Carbamidomethyl)	spALBU_BOVIN|	3	0.9467	0	580.948	1740.83	1740.83	0.27	0.00016	62.2403	45850	3.38
DSSO_Eluate_Streptavidin	GLVLIAFSQYLQQcPFDEHVK	C14(Carbamidomethyl)	spALBU_BOVIN|	3	1	0	831.425	2492.26	2492.26	-1.24	-0.00103	35.5043	48856	3.38
DSSO_Eluate_Streptavidin	mPcTEDYLSLILNR	M1(Oxidation); C3(Carbamidomethyl)	spALBU_BOVIN|	3	0.8249	0	580.948	1740.83	1740.83	0.59	0.00034	27.3938	47478	3.37
DSSO_Eluate_Streptavidin	RHPEYAVSVLLR		spALBU_BOVIN|	3	1	0	480.609	1439.81	1439.81	0.18	9e-05	20.2123	54365	3.36
DSSO_Eluate_Streptavidin	RHPYFYAPELLYYANK		spALBU_BOVIN|	3	0.8507	0	682.347	2045.03	2045.03	-0.49	-0.00034	0	49699	3.35
DSSO_Eluate_Streptavidin	GLVLIAFSQYLQQcPFDEHVK	C14(Carbamidomethyl)	spALBU_BOVIN|	3	1	0	831.428	2492.27	2492.26	2.21	0.00184	24.823	50762	3.34
DSSO_Eluate_Streptavidin	VHKEccHGDLLEcADDR	C5(Carbamidomethyl); C6(Carbamidomethyl); C13(Carbamidomethyl)	spALBU_BOVIN|	4	1	0	529.227	2113.89	2113.88	1.08	0.00057	9.78932	18634	3.32
DSSO_Eluate_Streptavidin	ccTKPESERmPcTEDYLSLILNR	C1(Carbamidomethyl); C2(Carbamidomethyl); M10(Oxidation); C12(Carbamidomethyl)	spALBU_BOVIN|	4	0.9366	0	722.825	2888.28	2888.3	-8.86	-0.0064	71.5721	42546	3.31
DSSO_Eluate_Streptavidin	LFTFHADIcTLPDTEKQIK	C9(Carbamidomethyl)	spALBU_BOVIN|	4	0.8333	0	570.045	2277.16	2277.16	0.63	0.00036	0	37062	3.3
DSSO_Eluate_Streptavidin	RHPEYAVSVLLR		spALBU_BOVIN|	3	1	0	480.609	1439.81	1439.81	-0.01	-1e-05	29.1698	46616	3.28
DSSO_Eluate_Streptavidin	LKPDPNTLcDEFKADEK	C9(Carbamidomethyl)	spALBU_BOVIN|	3	0.689	0	673.995	2019.97	2019.97	0.17	0.00011	10.9938	27727	3.28
DSSO_Eluate_Streptavidin	mPcTEDYLSLILNR	M1(Oxidation); C3(Carbamidomethyl)	spALBU_BOVIN|	3	0.896	0	580.948	1740.83	1740.83	0.59	0.00034	41.9246	49447	3.27
DSSO_Eluate_Streptavidin	RHPEYAVSVLLR		spALBU_BOVIN|	3	1	0	480.609	1439.81	1439.81	-0.27	-0.00013	30.1209	34914	3.26
DSSO_Eluate_Streptavidin	RHPEYAVSVLLR		spALBU_BOVIN|	3	1	0	480.609	1439.81	1439.81	0.56	0.00027	54.2761	50797	3.26
DSSO_Eluate_Streptavidin	RHPEYAVSVLLR		spALBU_BOVIN|	3	1	0	480.609	1439.81	1439.81	-0.39	-0.00019	44.0604	48435	3.25
DSSO_Eluate_Streptavidin	ccTKPESERmPcTEDYLSLILNR	C1(Carbamidomethyl); C2(Carbamidomethyl); M10(Oxidation); C12(Carbamidomethyl)	spALBU_BOVIN|	5	0.6677	0	578.467	2888.3	2888.3	0.11	7e-05	15.4489	38743	3.25
DSSO_Eluate_Streptavidin	RHPEYAVSVLLR		spALBU_BOVIN|	3	1	0	480.609	1439.81	1439.81	0.12	6e-05	55.8916	43620	3.24
DSSO_Eluate_Streptavidin	SLHTLFGDELcKVASLR	C11(Carbamidomethyl)	spALBU_BOVIN|	3	0.9814	0	649.345	1946.02	1946.02	1.75	0.00113	21.8434	40119	3.22
DSSO_Eluate_Streptavidin	LKPDPNTLcDEFKADEK	C9(Carbamidomethyl)	spALBU_BOVIN|	3	0.854	0	673.995	2019.97	2019.97	-0.02	-1e-05	80.1971	27259	3.22
DSSO_Eluate_Streptavidin	mDGTEELLVkLNR	M1(Oxidation); K10(DSSO:H2O)	Cas9	3	0.6978	0	570.608	1709.81	1709.81	-0.22	-0.00012	28.3325	38030	3.21
DSSO_Eluate_Streptavidin	MPcTEDYLSLILNR	C3(Carbamidomethyl)	spALBU_BOVIN|	3	0.8906	0	575.617	1724.84	1724.83	0.55	0.00031	32.7059	51355	3.2
DSSO_Eluate_Streptavidin	SNFDLAEDAkLQLSK	K10(DSSO:H2O)	Cas9	3	0.3679	0	618.964	1854.88	1854.88	-1.14	-0.0007	67.0776	39638	3.18
DSSO_Eluate_Streptavidin	GLVLIAFSQYLQQcPFDEHVK	C14(Carbamidomethyl)	spALBU_BOVIN|	3	1	0	831.427	2492.27	2492.26	1.25	0.00104	22.1005	46535	3.17
DSSO_Eluate_Streptavidin	LKHLVDEPQNLIK		spALBU_BOVIN|	4	0.694	0	387.48	1546.9	1546.9	0.87	0.00034	0	24466	3.17
DSSO_Eluate_Streptavidin	LVRPEVDVMcTAFHDNEETFLKk	C10(Carbamidomethyl); K23(DSSO:Tris)	spALBU_HUMAN|	4	0.0315	0	765.121	3057.46	3057.44	8.96	0.00685	20.952	40152	3.17
DSSO_Eluate_Streptavidin	VTEQESkPVQMmYQIGLFR	K7(DSSO:Tris); M12(Oxidation)	spOVAL_CHICK|	3	0.1483	0	860.404	2579.2	2579.22	-8.37	-0.0072	3.22905	43868	3.17
DSSO_Eluate_Streptavidin	HkPENIVIEmAR	K2(DSSO:H2O); M10(Oxidation)	Cas9	3	1	0	543.598	1628.78	1628.78	0.93	0.0005	29.7053	23214	3.17
DSSO_Eluate_Streptavidin	MDGTEELLVkLNR	K10(DSSO:H2O)	Cas9	3	0.8127	0	565.276	1693.81	1693.81	0.71	0.0004	5.15345	40795	3.15
DSSO_Eluate_Streptavidin	YNGVFQEccQAEDKGAcLLPK	C8(Carbamidomethyl); C9(Carbamidomethyl); C17(Carbamidomethyl)	spALBU_BOVIN|	3	0.9427	0	829.709	2487.11	2487.11	1.28	0.00106	14.5795	31349	3.14
DSSO_Eluate_Streptavidin	SHcIAEVEKDAIPENLPPLTADFAEDKDVcK	C3(Carbamidomethyl); C30(Carbamidomethyl)	spALBU_BOVIN|	4	1	0	878.674	3511.67	3511.67	0.57	0.0005	0	35550	3.14
DSSO_Eluate_Streptavidin	KVPQVSTPTLVEVSRSLGK		spALBU_BOVIN|	3	1	0	675.729	2025.17	2025.17	1.26	0.00085	25.8661	29910	3.13
DSSO_Eluate_Streptavidin	RHPEYAVSVLLR		spALBU_BOVIN|	3	1	0	480.609	1439.81	1439.81	1.26	0.0006	40.7119	44179	3.13
DSSO_Eluate_Streptavidin	MPcTEDYLSLILNR	C3(Carbamidomethyl)	spALBU_BOVIN|	3	0.9361	0	575.617	1724.84	1724.83	0.55	0.00031	67.26	49844	3.13
DSSO_Eluate_Streptavidin	RHPEYAVSVLLR		spALBU_BOVIN|	3	1	0	480.61	1439.81	1439.81	1.83	0.00088	60.6435	55124	3.12
DSSO_Eluate_Streptavidin	kNLIGALLFDSGETAEATR	K1(DSSO:H2O)	Cas9	3	0.7878	0	728.028	2182.07	2182.07	0.27	0.0002	0	48258	3.11
DSSO_Eluate_Streptavidin	LcVLHEKTPVSEK	C2(Carbamidomethyl)	spALBU_BOVIN|	3	1	0	513.945	1539.82	1539.82	-0.13	-7e-05	28.5408	19757	3.11
DSSO_Eluate_Streptavidin	ATEEQLKTVMENFVAFVDK		spALBU_BOVIN|	4	0.9035	0	550.531	2199.1	2199.1	0.58	0.00032	67.4686	52429	3.11
DSSO_Eluate_Streptavidin	RHPEYAVSVLLR		spALBU_BOVIN|	3	1	0	480.609	1439.81	1439.81	-0.27	-0.00013	36.2849	45465	3.1
DSSO_Eluate_Streptavidin	HPYFYAPELLYYANK		spALBU_BOVIN|	3	1	0	630.314	1888.93	1888.93	0.55	0.00035	42.1733	41743	3.09
DSSO_Eluate_Streptavidin	TILDFLkSDGFANR	K7(DSSO:H2O)	Cas9	3	0.9026	0	591.622	1772.85	1772.85	-0.6	-0.00036	54.9196	42005	3.08
DSSO_Eluate_Streptavidin	IIkDkDFLDNEENEDILEDIVLTLTLFEDR	K3(DSSO:Tris); K5(DSSO:H2O)	Cas9	4	0.1006	0	1016.48	4062.91	4062.92	-2.98	-0.00303	0	44649	3.08
DSSO_Eluate_Streptavidin	EYEATLEEccAKDDPHAcYSTVFDK	C9(Carbamidomethyl); C10(Carbamidomethyl); C18(Carbamidomethyl)	spALBU_BOVIN|	4	1	0	760.322	3038.26	3038.25	5.16	0.00392	0	28887	3.08
DSSO_Eluate_Streptavidin	FDkLPGFGDSIEAQcGTSVNVHSSLR	K3(DSSO:Tris); C15(Carbamidomethyl)	spOVAL_CHICK|	3	0.4397	0	1034.15	3100.43	3100.44	-1.49	-0.00154	6.10875	39742	3.07
DSSO_Eluate_Streptavidin	ccTKPESERmPcTEDYLSLILNR	C1(Carbamidomethyl); C2(Carbamidomethyl); M10(Oxidation); C12(Carbamidomethyl)	spALBU_BOVIN|	4	1	0	722.833	2888.31	2888.3	1.62	0.00117	46.5331	38145	3.07
DSSO_Eluate_Streptavidin	VTEQESkPVQMmYQIGLFR	K7(DSSO:Tris); M12(Oxidation)	spOVAL_CHICK|	3	0.1759	0	860.404	2579.2	2579.22	-7.87	-0.00677	0	44562	3.07
DSSO_Eluate_Streptavidin	RHPEYAVSVLLR		spALBU_BOVIN|	3	1	0	480.609	1439.81	1439.81	-0.08	-4e-05	17.5004	47054	3.07
DSSO_Eluate_Streptavidin	LVRPEVDVMcTAFHDNEETFLkK	C10(Carbamidomethyl); K22(DSSO:Tris)	spALBU_HUMAN|	4		0.0315	765.121	3057.46	3057.44	8.96	0.00685	20.952	40152	3.07
DSSO_Eluate_Streptavidin	AFDEKLFTFHADIcTLPDTEK	C14(Carbamidomethyl)	spALBU_BOVIN|	3	0.817	0	833.404	2498.2	2498.19	2.21	0.00184	26.9359	40033	3.06
DSSO_Eluate_Streptavidin	RHPEYAVSVLLR		spALBU_BOVIN|	3	1	0	480.609	1439.81	1439.81	-0.46	-0.00022	44.9973	48063	3.05
DSSO_Eluate_Streptavidin	mPcTEDYLSLILNR	M1(Oxidation); C3(Carbamidomethyl)	spALBU_BOVIN|	3	0.8689	0	580.948	1740.83	1740.83	0.59	0.00034	37.1692	45407	3.05
DSSO_Eluate_Streptavidin	LcVLHEKTPVSEK	C2(Carbamidomethyl)	spALBU_BOVIN|	4	1	0	385.71	1539.82	1539.82	-0.14	-5e-05	24.1725	19777	3.05
DSSO_Eluate_Streptavidin	AFDEKLFTFHADIcTLPDTEK	C14(Carbamidomethyl)	spALBU_BOVIN|	4	0.7336	0	625.303	2498.19	2498.19	-0.09	-6e-05	0	39412	3.04
DSSO_Eluate_Streptavidin	GLVLIAFSQYLQQcPFDEHVK	C14(Carbamidomethyl)	spALBU_BOVIN|	3	1	0	831.428	2492.27	2492.26	1.62	0.00135	81.771	47967	3.04
DSSO_Eluate_Streptavidin	QEDFYPFLkDNR	K9(DSSO:H2O)	Cas9	3	1	0	583.26	1747.77	1747.76	1.29	0.00075	0	38514	3.03
DSSO_Eluate_Streptavidin	RHPYFYAPELLYYANK		spALBU_BOVIN|	3	0.9769	0	682.347	2045.03	2045.03	-1.03	-0.0007	36.54	43548	3.03
DSSO_Eluate_Streptavidin	LFTFHADIcTLPDTEK	C9(Carbamidomethyl)	spALBU_BOVIN|	3	0.887	0	636.645	1907.92	1907.92	-0.24	-0.00015	58.3933	34466	3.01
DSSO_Eluate_Streptavidin	HIGEVVKPATMSNNAETQVNQNITVTGYPGDkPVATmWESkGkITYLK	K32(DSSO:H2O); M37(Oxidation); K41(DSSO:H2O); K43(DSSO:H2O)	spSSPA_STAAU|	5	0.2691	0	1158.76	5789.75	5789.7	8.3	0.00962	0	42446	3.01
DSSO_Eluate_Streptavidin	RHPYFYAPELLYYANK		spALBU_BOVIN|	3	1	0	682.348	2045.03	2045.03	0.85	0.00058	32.3488	55007	3
DSSO_Eluate_Streptavidin	RHPEYAVSVLLR		spALBU_BOVIN|	3	1	0	480.609	1439.81	1439.81	-0.52	-0.00025	0	41894	3
DSSO_Eluate_Streptavidin	IIkDkDFLDNEENEDILEDIVLTLTLFEDR	K3(DSSO:Tris); K5(DSSO:H2O)	Cas9	4	0.1443	0	1016.48	4062.89	4062.92	-7.01	-0.00712	34.3785	42686	2.98
DSSO_Eluate_Streptavidin	HPYFYAPELLYYANK		spALBU_BOVIN|	3	1	0	630.316	1888.93	1888.93	3.75	0.00236	51.5634	42967	2.97
DSSO_Eluate_Streptavidin	RHPYFYAPELLYYANK		spALBU_BOVIN|	3	1	0	682.35	2045.04	2045.03	3.81	0.00259	71.1693	35194	2.96
DSSO_Eluate_Streptavidin	HPYFYAPELLYYANK		spALBU_BOVIN|	3	1	0	630.314	1888.93	1888.93	0.26	0.00016	0	45749	2.95
DSSO_Eluate_Streptavidin	MPcTEDYLSLILNR	C3(Carbamidomethyl)	spALBU_BOVIN|	3	0.949	0	575.617	1724.84	1724.83	0.33	0.00019	74.6053	49355	2.94
DSSO_Eluate_Streptavidin	MPcTEDYLSLILNR	C3(Carbamidomethyl)	spALBU_BOVIN|	3	0.9249	0	575.616	1724.83	1724.83	-0.09	-5e-05	26.1689	52276	2.93
DSSO_Eluate_Streptavidin	TcVADESHAGcEK	C2(Carbamidomethyl); C11(Carbamidomethyl)	spALBU_BOVIN|	3	1	0	488.535	1463.59	1463.59	0.4	0.0002	40.2719	12434	2.9
DSSO_Eluate_Streptavidin	RHPYFYAPELLYYANK		spALBU_BOVIN|	4	0.8754	0	512.013	2045.03	2045.03	0.25	0.00013	78.7346	37708	2.89
DSSO_Eluate_Streptavidin	RHPEYAVSVLLR		spALBU_BOVIN|	3	1	0	480.609	1439.81	1439.81	0.94	0.00045	48.2954	53255	2.89
DSSO_Eluate_Streptavidin	RHPEYAVSVLLR		spALBU_BOVIN|	3	1	0	480.61	1439.81	1439.81	1.7	0.00082	58.9888	50464	2.87
DSSO_Eluate_Streptavidin	NPIDFLEAkGYK	K9(DSSO:H2O)	Cas9	3	0.3171	0	524.254	1570.75	1570.75	0.3	0.00016	0	40110	2.87
DSSO_Eluate_Streptavidin	MSkGEELFTGVVPILVELDGDVNGHk	K3(DSSO:Tris); K26(DSSO:Tris)	spGFP_AEQVI|	3	0.8328	0	1114.53	3341.56	3341.58	-5.63	-0.00627	7.96317	38039	2.87
DSSO_Eluate_Streptavidin	LVRPEVDVMcTAFHDNEETFLKk	C10(Carbamidomethyl); K23(DSSO:Tris)	spALBU_HUMAN|	4	0.0035	0	765.112	3057.43	3057.44	-3.65	-0.00279	0.427017	40022	2.82
DSSO_Eluate_Streptavidin	TILDFLkSDGFANR	K7(DSSO:H2O)	Cas9	3	1	0	591.623	1772.85	1772.85	0.53	0.00031	8.73234	48824	2.81
DSSO_Eluate_Streptavidin	LVRPEVDVMcTAFHDNEETFLkK	C10(Carbamidomethyl); K22(DSSO:Tris)	spALBU_HUMAN|	4		0.0035	765.112	3057.43	3057.44	-3.65	-0.00279	0.427017	40022	2.81
DSSO_Eluate_Streptavidin	YPkLESEFVYGDYK	K3(DSSO:H2O)	Cas9	3	0.8857	0	638.622	1913.85	1913.85	0.54	0.00034	40.0747	38206	2.8
DSSO_Eluate_Streptavidin	VTEQESkPVQMmYQIGLFR	K7(DSSO:Tris); M12(Oxidation)	spOVAL_CHICK|	3	0.2372	0	860.408	2579.21	2579.22	-3.54	-0.00305	15.9617	42992	2.74
DSSO_Eluate_Streptavidin	MTNFDkNLPNEK	K6(DSSO:H2O)	Cas9	3	0.7143	0	542.909	1626.71	1626.71	-0.51	-0.00028	11.1987	26828	2.73
DSSO_Eluate_Streptavidin	HPYFYAPELLYYANK		spALBU_BOVIN|	3	0.9853	0	630.313	1888.92	1888.93	-1.1	-0.00069	0	43897	2.72
DSSO_Eluate_Streptavidin	FDkLPGFGDSIEAQcGTSVNVHSSLR	K3(DSSO:Tris); C15(Carbamidomethyl)	spOVAL_CHICK|	4	0.2472	0	775.865	3100.44	3100.44	0.61	0.00047	15.7048	39773	2.71
DSSO_Eluate_Streptavidin	TILDFLkSDGFANR	K7(DSSO:H2O)	Cas9	3	0.8593	0	591.621	1772.85	1772.85	-2.05	-0.00121	50.5304	47479	2.7
DSSO_Eluate_Streptavidin	LNFNGEGEPEELMVDNWRPAQPLk	K24(DSSO:H2O)	spCAH2_HUMAN|	3	1	0	987.116	2959.33	2959.36	-8.6	-0.00848	51.7998	40511	2.7
DSSO_Eluate_Streptavidin	IEEGIkELGSQILK	K6(DSSO:H2O)	Cas9	3	0.6952	0	578.306	1732.9	1732.9	-0.32	-0.00019	0	41053	2.69
DSSO_Eluate_Streptavidin	ILDELTLcRSDLEAQVESLk	C8(Carbamidomethyl); K20(DSSO:Tris)	spK1HA_HUMAN|	3	0.8308	0	871.1	2611.29	2611.28	0.55	0.00048	0	26862	2.66
DSSO_Eluate_Streptavidin	ILDELTLcKADLEAQVESLk	C8(Carbamidomethyl); K20(DSSO:Tris)	spK1H6_HUMAN|	4	0.5057	0	642.573	2567.27	2567.28	-5.21	-0.00334	15.1477	26748	2.63
DSSO_Eluate_Streptavidin	IIkDkDFLDNEENEDILEDIVLTLTLFEDR	K3(DSSO:Tris); K5(DSSO:H2O)	Cas9	4	0.1603	0	1016.48	4062.9	4062.92	-4.31	-0.00437	19.4428	43208	2.62
DSSO_Eluate_Streptavidin	HEHHPLHGQVMDEQTmVQDILLmK	M16(Oxidation); M23(Oxidation)	spBGAL_ECOLI|	3	0.7939	0	966.794	2898.37	2898.37	-0.21	-0.0002	12.3114	37124	2.62
DSSO_Eluate_Streptavidin	LNYkPEEEYPDLSkHNNHMAKVLTLELYK	K4(DSSO:Tris); K14(DSSO:Tris)	spKCRM_HUMAN|	4	0.6718	0	1019.49	4074.94	4074.94	0.81	0.00083	3.63297	45001	2.62
DSSO_Eluate_Streptavidin	LESEFVYGDYkVYDVR	K11(DSSO:H2O)	Cas9	3	0.6475	0	719.995	2157.97	2157.97	0.72	0.00052	52.4729	38097	2.61
DSSO_Eluate_Streptavidin	HPYFYAPELLYYANK		spALBU_BOVIN|	3	1	0	630.315	1888.93	1888.93	1.33	0.00084	14.0705	45279	2.59
DSSO_Eluate_Streptavidin	mDGTEELLVkLNR	M1(Oxidation); K10(DSSO:H2O)	Cas9	3	0.6381	0	570.607	1709.81	1709.81	-0.32	-0.00018	0	39329	2.57
DSSO_Eluate_Streptavidin	RHPYFYAPELLYYANK		spALBU_BOVIN|	3	0.9258	0	682.347	2045.03	2045.03	-0.04	-3e-05	75.3724	55420	2.56
DSSO_Eluate_Streptavidin	TVmENFVAFVDKccAADDKEAcFAVEGPK	M3(Oxidation); C13(Carbamidomethyl); C14(Carbamidomethyl); C22(Carbamidomethyl)	spALBU_BOVIN|	3	0.5787	0	1108.84	3324.49	3324.47	8.04	0.00891	21.8694	41200	2.54
DSSO_Eluate_Streptavidin	HPYFYAPELLYYANK		spALBU_BOVIN|	3	1	0	630.314	1888.93	1888.93	-0.42	-0.00026	37.5324	46536	2.53
DSSO_Eluate_Streptavidin	GLVLIAFSQYLQQcPFDEHVK	C14(Carbamidomethyl)	spALBU_BOVIN|	3	1	0	831.427	2492.27	2492.26	1.25	0.00104	56.4828	51257	2.51
DSSO_Eluate_Streptavidin	mPcTEDYLSLILNR	M1(Oxidation); C3(Carbamidomethyl)	spALBU_BOVIN|	3	0.844	0	580.948	1740.83	1740.83	0.27	0.00016	84.238	44973	2.5
DSSO_Eluate_Streptavidin	LTQNDVGHPFAVAVFEDYVWFSDWAmPSVIR	M26(Oxidation)	spEGF_HUMAN|	3	0.8449	0	1204.91	3612.73	3612.73	0.35	0.00042	0	42350	2.45
DSSO_Eluate_Streptavidin	kAYWQVHLDQVEVASGLTLck	K1(DSSO:H2O); C20(Carbamidomethyl); K21(DSSO:Tris)	spCATD_HUMAN|	3	1	0	967.46	2900.37	2900.35	5.09	0.00492	0	38671	2.42
DSSO_Eluate_Streptavidin	cAALRmLLADQGQSWK	C1(Carbamidomethyl); M6(Oxidation)	spGSTP1_HUMAN|	3	0.6141	0	621.982	1863.93	1863.92	5.33	0.00331	0	36977	2.41
DSSO_Eluate_Streptavidin	AFDEKLFTFHADIcTLPDTEK	C14(Carbamidomethyl)	spALBU_BOVIN|	3	0.7552	0	833.404	2498.2	2498.19	2.14	0.00178	58.6854	41509	2.41
DSSO_Eluate_Streptavidin	GLVLIAFSQYLQQcPFDEHVK	C14(Carbamidomethyl)	spALBU_BOVIN|	3	1	0	831.426	2492.26	2492.26	0.15	0.00013	0	48379	2.38
DSSO_Eluate_Streptavidin	AkVFkDVFLEMNIPYSVVR	K2(DSSO:H2O); K5(DSSO:H2O)	spCO5_HUMAN|	3	0.8376	0	869.753	2607.25	2607.25	-3.45	-0.003	42.3681	43461	2.34
DSSO_Eluate_Streptavidin	RPcFSALTPDETYVPKAFDEK	C3(Carbamidomethyl)	spALBU_BOVIN|	3	0.7521	0	824.402	2471.19	2471.19	-0.05	-4e-05	20.8541	33219	2.34
DSSO_Eluate_Streptavidin	ITVDDkHYQkALNEINQFYQk	K6(DSSO:Tris); K10(DSSO:Tris); K21(DSSO:H2O)	spCAS2_BOVIN|	3	0.312	0	1110.51	3329.51	3329.49	4.62	0.00513	43.9957	46831	2.34
DSSO_Eluate_Streptavidin	GGLSELDkAGFIK	K8(DSSO:H2O)	Cas9	3	0.4872	0	504.253	1510.75	1510.75	0.07	4e-05	15.7915	36723	2.34
DSSO_Eluate_Streptavidin	ccTKPESERmPcTEDYLSLILNR	C1(Carbamidomethyl); C2(Carbamidomethyl); M10(Oxidation); C12(Carbamidomethyl)	spALBU_BOVIN|	3	1	0	963.44	2888.3	2888.3	-0.13	-0.00012	5.36693	38715	2.32
DSSO_Eluate_Streptavidin	VPQVSTPTLVEVSR		spALBU_BOVIN|; spALBU_HUMAN|	3	0.9437	0	504.62	1511.84	1511.84	0.78	0.00039	70.3535	31935	2.31
